# Supplementary material for: YAP1 as a Novel Negative Biomarker of Immune Checkpoint Inhibitors for EGFR-Mutant Non-Small-Cell Lung Cancer
Source: Hindawi journal article supplement (doi:10.1155/2023/4689004), 2023-06-21
Supplement: f1 [file 4689004.f1.pdf]

## TCGA\_LUAD

| Sample_id       | OS_event | OS_time       | PFS_event | PFS_time      | YAP1_expression | EGFR |
|-----------------|----------|---------------|-----------|---------------|-----------------|------|
| TCGA-55-8620-01 | 1        | 12.5          | 1         | 12.5          | 1.242056619     | Wt   |
| TCGA-55-5899-01 | 0        | 31            | 0         | 31            | 2.163269954     | Wt   |
| TCGA-44-7667-01 | 0        | 36.566666667  | 0         | 36.566666667  | 2.185623692     | Wt   |
| TCGA-55-6968-01 | 1        | 43.1          | 1         | 43.1          | 2.234752035     | Mut  |
| TCGA-86-8358-01 | 0        | 21.766666667  | 0         | 21.766666667  | 2.265098089     | Wt   |
| TCGA-44-5644-01 | 0        | 28.766666667  | 0         | 28.766666667  | 2.343362284     | Wt   |
| TCGA-4B-A93V-01 | 1        | 10            | 1         | 8.366666667   | 2.436434932     | Wt   |
| TCGA-49-AAR2-01 | 0        | 74.133333333  | 0         | 74.133333333  | 2.469280747     | Wt   |
| TCGA-44-7669-01 | 1        | 19.133333333  | 1         | 13            | 2.729972912     | Wt   |
| TCGA-49-4514-01 | 0        | 56.666666667  | 0         | 56.666666667  | 2.797529837     | Wt   |
| TCGA-49-AARE-01 | 1        | 40.966666667  | 1         | 12.933333333  | 2.8007718       | Wt   |
| TCGA-64-1678-01 | 0        | 39.633333333  | 0         | 39.633333333  | 2.865278249     | Wt   |
| TCGA-91-8499-01 | 0        | 1.2           | 0         | 1.2           | 2.902560114     | Wt   |
| TCGA-55-A490-01 | 1        | 3.3           | 0         | 3.3           | 2.955003271     | Wt   |
| TCGA-86-A4D0-01 | 1        | 3.866666667   | 0         | 3.866666667   | 2.984797747     | Wt   |
| TCGA-MP-A4TE-01 | 1        | 29.866666667  | 1         | 7.533333333   | 3.020724623     | Wt   |
| TCGA-55-8094-01 | 0        | 18.033333333  | 0         | 18.033333333  | 3.067544397     | Wt   |
| TCGA-64-5774-01 | 0        | 89.2          | 1         | 8.2           | 3.150479665     | Wt   |
| TCGA-55-7728-01 | 0        | 23.466666667  | 0         | 23.466666667  | 3.218339516     | Wt   |
| TCGA-35-4122-01 | 0        | 7.5           | 0         | 7.5           | 3.225889528     | Wt   |
| TCGA-55-7995-01 | 0        | 29.633333333  | 1         | 15.6          | 3.24100651      | Wt   |
| TCGA-49-4494-01 | 1        | 36.033333333  | 1         | 36.033333333  | 3.242563895     | Mut  |
| TCGA-64-5778-01 | 0        | 43.5          | 1         | 32.066666667  | 3.25852321      | Wt   |
| TCGA-95-A4VP-01 | 0        | 20.166666667  | 1         | 7.2           | 3.277806451     | Wt   |
| TCGA-49-AARQ-01 | 0        | 224.4         | 0         | 224.4         | 3.306556647     | Wt   |
| TCGA-49-AAR0-01 | 0        | 158.833333333 | 0         | 158.833333333 | 3.317435636     | Wt   |
| TCGA-80-5608-01 | 0        | 94.4          | 0         | 94.4          | 3.354498836     | Wt   |
| TCGA-55-8615-01 | 0        | 14.866666667  | 1         | 7.466666667   | 3.365117944     | Wt   |
| TCGA-49-6761-01 | 0        | 11.8          | 0         | 11.8          | 3.373186349     | Wt   |
| TCGA-55-8203-01 | 0        | 18.233333333  | 0         | 18.233333333  | 3.386906159     | Wt   |
| TCGA-35-5375-01 | 0        | 8.8           | 0         | 8.8           | 3.413714387     | Wt   |
| TCGA-86-8054-01 | 0        | 38.266666667  | 0         | 38.266666667  | 3.429290921     | Wt   |
| TCGA-NJ-A55R-01 | 0        | 20.1          | 0         | 20.1          | 3.461651682     | Wt   |
| TCGA-MP-A4TD-01 | 1        | 10.233333333  | 1         | 7.533333333   | 3.475931103     | Wt   |
| TCGA-55-8508-01 | 0        | 20.566666667  | 0         | 20.566666667  | 3.502279559     | Wt   |
| TCGA-MN-A4N1-01 | 0        | 27.566666667  | 0         | 27.566666667  | 3.504126557     | Wt   |
| TCGA-50-6597-01 | 1        | 42.266666667  | 0         | 42.266666667  | 3.521173508     | Wt   |
| TCGA-49-AAQV-01 | 1        | 22.566666667  | 1         | 16.966666667  | 3.523326976     | Wt   |
| TCGA-05-5420-01 | 0        | 15.233333333  | 1         | 8.166666667   | 3.532425963     | Wt   |
| TCGA-91-6835-01 | 0        | 2.633333333   | 0         | 2.633333333   | 3.536779202     | Mut  |
| TCGA-86-7953-01 | 0        | 33.233333333  | 0         | 33.233333333  | 3.547303151     | Wt   |
| TCGA-44-5643-01 | 0        | 33.766666667  | 0         | 33.766666667  | 3.562328149     | Wt   |
| TCGA-69-8255-01 | 0        | 4.3           | 0         | 4.3           | 3.56456479      | Wt   |
| TCGA-95-A4VN-01 | 0        | 18.433333333  | 0         | 18.433333333  | 3.592350247     | Wt   |
| TCGA-73-7499-01 | 1        | 51.033333333  | 1         | 48.233333333  | 3.600679924     | Wt   |
| TCGA-38-4632-01 | 1        | 45.233333333  | 1         | 22.666666667  | 3.605061827     | Wt   |
| TCGA-L9-A444-01 | 0        | 10.233333333  | 0         | 10.233333333  | 3.607474782     | Wt   |
| TCGA-44-7660-01 | 0        | 19.733333333  | 1         | 8.433333333   | 3.611131105     | Wt   |
| TCGA-44-6778-01 | 0        | 62.133333333  | 0         | 62.133333333  | 3.635479124     | Wt   |
| TCGA-49-4506-01 | 1        | 33.3          | 1         | 23.066666667  | 3.646803103     | Wt   |
| TCGA-55-8208-01 | 0        | 22.466666667  | 1         | 17.033333333  | 3.651161019     | Wt   |
| TCGA-50-5066-01 | 0        | 48.066666667  | 1         | 15.9          | 3.65960594      | Mut  |
| TCGA-86-8585-01 | 0        | 11.766666667  | 0         | 11.766666667  | 3.66616608      | Wt   |
| TCGA-50-5931-01 | 1        | 14.466666667  | 1         | 14.166666667  | 3.669346226     | Wt   |
| TCGA-99-8032-01 | 0        | 1.466666667   | 0         | 1.466666667   | 3.683058193     | Wt   |
| TCGA-55-A4DF-01 | 1        | 20.466666667  | 1         | 17.166666667  | 3.683338595     | Wt   |
| TCGA-44-7672-01 | 0        | 23.966666667  | 0         | 23.966666667  | 3.687495155     | Wt   |
| TCGA-78-7166-01 | 1        | 8.6           | 0         | 8.6           | 3.697877531     | Wt   |

|                 |   |              |   |              |             |     |
|-----------------|---|--------------|---|--------------|-------------|-----|
| TCGA-62-A471-01 | 0 | 41.533333333 | 0 | 41.533333333 | 3.70560262  | Wt  |
| TCGA-91-A4BD-01 | 0 | 20.1         | 0 | 20.1         | 3.711724329 | Wt  |
| TCGA-86-8673-01 | 0 | 28.733333333 | 1 | 21.2         | 3.713567926 | Wt  |
| TCGA-62-A46P-01 | 1 | 19.8         | 1 | 8.9          | 3.715165492 | Wt  |
| TCGA-95-7043-01 | 1 | 16.766666667 | 1 | 16.766666667 | 3.716080815 | Wt  |
| TCGA-MN-A4N5-01 | 0 | 2.8          | 0 | 2.8          | 3.728386732 | Wt  |
| TCGA-62-A46S-01 | 1 | 55.1         | 1 | 17.566666667 | 3.73466567  | Wt  |
| TCGA-99-8028-01 | 0 | 37.266666667 | 0 | 37.266666667 | 3.770762492 | Wt  |
| TCGA-55-6987-01 | 0 | 71.233333333 | 0 | 71.233333333 | 3.783131003 | Wt  |
| TCGA-05-4403-01 | 0 | 19.266666667 | 0 | 19.266666667 | 3.785780212 | Wt  |
| TCGA-55-8302-01 | 0 | 15.933333333 | 0 | 15.933333333 | 3.806368881 | Wt  |
| TCGA-95-8494-01 | 0 | 2.8          | 0 | 2.8          | 3.825114327 | Wt  |
| TCGA-44-4112-01 | 1 | 26.933333333 | 1 | 20.633333333 | 3.833320495 | Wt  |
| TCGA-50-5051-01 | 1 | 15.933333333 | 1 | 6.133333333  | 3.844354356 | Wt  |
| TCGA-69-8453-01 | 0 | 27.1         | 1 | 11.466666667 | 3.853966863 | Wt  |
| TCGA-55-A491-01 | 0 | 20.866666667 | 0 | 20.866666667 | 3.855062418 | Wt  |
| TCGA-49-AAR4-01 | 1 | 29.3         | 1 | 29.3         | 3.857162851 | Wt  |
| TCGA-44-8119-01 | 0 | 9.5          | 0 | 9.5          | 3.864360508 | Wt  |
| TCGA-05-4389-01 | 0 | 45.633333333 | 0 | 45.633333333 | 3.881941141 | Wt  |
| TCGA-50-5045-01 | 1 | 72.466666667 | 1 | 47.766666667 | 3.885585904 | Wt  |
| TCGA-55-A493-01 | 0 | 0.933333333  | 0 | 0.933333333  | 3.885998515 | Wt  |
| TCGA-64-5815-01 | 0 | 28.866666667 | 0 | 28.866666667 | 3.894796319 | Wt  |
| TCGA-38-4628-01 | 1 | 49.733333333 | 1 | 36.1         | 3.896731914 | Mut |
| TCGA-55-7281-01 | 0 | 29.066666667 | 1 | 11.3         | 3.905666383 | Wt  |
| TCGA-95-8039-01 | 0 | 27.666666667 | 1 | 7.6          | 3.91582095  | Wt  |
| TCGA-49-4507-01 | 1 | 8.933333333  | 1 | 5.266666667  | 3.918963147 | Wt  |
| TCGA-49-4512-01 | 1 | 30.166666667 | 1 | 30.166666667 | 3.925777661 | Wt  |
| TCGA-50-5044-01 | 1 | 20.8         | 1 | 16.1         | 3.926157771 | Wt  |
| TCGA-75-5147-01 | 0 | 44.433333333 | 0 | 44.433333333 | 3.932953156 | Wt  |
| TCGA-86-7701-01 | 0 | 31.566666667 | 1 | 14.133333333 | 3.943489118 | Wt  |
| TCGA-50-5068-01 | 1 | 49.966666667 | 1 | 22.866666667 | 3.944855008 | Wt  |
| TCGA-05-4433-01 | 0 | 24.333333333 | 0 | 24.333333333 | 3.94970064  | Wt  |
| TCGA-93-8067-01 | 0 | 6.2          | 0 | 6.2          | 3.952942459 | Wt  |
| TCGA-78-7220-01 | 1 | 26.9         | 1 | 17.7         | 3.959652257 | Wt  |
| TCGA-44-A4SS-01 | 0 | 13.833333333 | 0 | 13.833333333 | 3.962107834 | Wt  |
| TCGA-55-1594-01 | 0 | 39.266666667 | 0 | 39.266666667 | 3.962233598 | Wt  |
| TCGA-75-6211-01 | 1 |              | 1 | 0            | 3.963610315 | Wt  |
| TCGA-55-7283-01 | 0 | 20.3         | 0 | 20.3         | 3.964640168 | Wt  |
| TCGA-05-5429-01 | 1 | 9.166666667  | 0 | 9.166666667  | 3.964833452 | Wt  |
| TCGA-49-4487-01 | 1 | 28.5         | 1 | 23.233333333 | 3.966529015 | Wt  |
| TCGA-97-8176-01 | 1 | 15.6         | 1 | 1.3          | 3.975022743 | Wt  |
| TCGA-50-5055-01 | 1 | 61           | 1 | 25.7         | 3.979786467 | Wt  |
| TCGA-55-6983-01 | 0 | 94.1         | 0 | 94.1         | 4.00224814  | Wt  |
| TCGA-MP-A4TJ-01 | 1 | 11.3         | 0 | 11.3         | 4.006325996 | Wt  |
| TCGA-44-3917-01 | 0 | 39.433333333 | 0 | 39.433333333 | 4.011650435 | Wt  |
| TCGA-44-A479-01 | 0 | 16.2         | 1 | 14.566666667 | 4.020039765 | Wt  |
| TCGA-NJ-A55O-01 | 0 | 0.433333333  | 0 | 0.433333333  | 4.022233357 | Wt  |
| TCGA-05-4390-01 | 0 | 37.533333333 | 1 | 13.166666667 | 4.022272359 | Wt  |
| TCGA-L9-A8F4-01 | 0 | 15.866666667 | 0 | 15.866666667 | 4.026329284 | Wt  |
| TCGA-78-7159-01 | 0 | 65.8         | 0 | 65.8         | 4.028110504 | Wt  |
| TCGA-55-A494-01 | 0 | 16.033333333 | 0 | 16.033333333 | 4.031207558 | Wt  |
| TCGA-38-4625-01 | 0 | 99.1         | 0 | 99.1         | 4.036834167 | Wt  |
| TCGA-05-4432-01 | 0 | 25.366666667 | 0 | 25.366666667 | 4.050391714 | Wt  |
| TCGA-44-3918-01 | 0 | 34.533333333 | 1 | 17.033333333 | 4.052062763 | Wt  |
| TCGA-86-8074-01 | 0 | 0.8          | 0 | 0.8          | 4.053881721 | Mut |
| TCGA-05-5428-01 | 0 | 22.333333333 | 0 | 22.333333333 | 4.066663199 | Wt  |
| TCGA-05-4417-01 | 0 | 15.166666667 | 0 | 15.166666667 | 4.067697408 | Wt  |
| TCGA-99-8025-01 | 0 | 35.333333333 | 0 | 35.333333333 | 4.074909497 | Wt  |
| TCGA-55-6971-01 | 0 | 46.666666667 | 0 | 46.666666667 | 4.076198612 | Wt  |
| TCGA-86-8671-01 | 0 | 27.966666667 | 0 | 27.966666667 | 4.077046754 | Wt  |
| TCGA-69-7973-01 | 0 | 7.666666667  | 0 | 7.666666667  | 4.080756184 | Wt  |
| TCGA-64-5781-01 | 0 | 51.966666667 | 1 | 3.2          | 4.081093038 | Wt  |

|                 |   |               |   |              |             |     |
|-----------------|---|---------------|---|--------------|-------------|-----|
| TCGA-49-4488-01 | 1 | 28.966666667  | 1 | 21.133333333 | 4.086719289 | Wt  |
| TCGA-NJ-A4YF-01 | 0 | 72.033333333  | 0 | 72.033333333 | 4.088268064 | Wt  |
| TCGA-73-4659-01 | 1 | 23.7          | 1 | 1.166666667  | 4.088699083 | Wt  |
| TCGA-L4-A4E6-01 | 0 | 14.5          | 0 | 14.5         | 4.099101812 | Wt  |
| TCGA-NJ-A4YQ-01 | 0 | 47.733333333  | 0 | 47.733333333 | 4.109150796 | Wt  |
| TCGA-55-8510-01 | 0 | 17.966666667  | 0 | 17.966666667 | 4.109481801 | Wt  |
| TCGA-38-A44F-01 | 0 | 4.433333333   | 0 | 4.433333333  | 4.113242578 | Wt  |
| TCGA-95-7944-01 | 0 | 12.566666667  | 0 | 12.566666667 | 4.121240215 | Wt  |
| TCGA-05-4418-01 | 1 | 9.133333333   | 0 | 9.133333333  | 4.13335106  | Wt  |
| TCGA-50-5049-01 | 0 | 103.133333333 | 1 | 52.266666667 | 4.139153517 | Wt  |
| TCGA-L9-A743-01 | 0 | 22.133333333  | 0 | 22.133333333 | 4.141958459 | Wt  |
| TCGA-38-4629-01 | 1 | 28.8          | 1 | 12.633333333 | 4.146139332 | Mut |
| TCGA-62-8395-01 | 0 | 40.533333333  | 1 | 13.166666667 | 4.14915488  | Wt  |
| TCGA-55-7903-01 | 0 | 18.9          | 0 | 18.9         | 4.149570184 | Wt  |
| TCGA-86-A456-01 | 0 | 29.866666667  | 0 | 29.866666667 | 4.154344717 | Wt  |
| TCGA-62-A470-01 | 1 | 39.8          | 1 | 17.966666667 | 4.158350463 | Wt  |
| TCGA-49-4510-01 | 1 | 29.866666667  | 1 | 16.733333333 | 4.158361808 | Wt  |
| TCGA-35-4123-01 | 0 | 6.066666667   | 0 | 6.066666667  | 4.164957474 | Wt  |
| TCGA-L9-A443-01 | 1 | 6.433333333   | 0 | 6.433333333  | 4.171751514 | Wt  |
| TCGA-50-8460-01 | 0 | 27.633333333  | 0 | 27.633333333 | 4.187923607 | Wt  |
| TCGA-91-A4BC-01 | 0 | 1.466666667   | 0 | 1.466666667  | 4.188487294 | Wt  |
| TCGA-78-7540-01 | 1 | 39.9          | 0 | 39.9         | 4.196743869 | Wt  |
| TCGA-86-8674-01 | 0 | 26.866666667  | 1 | 11.133333333 | 4.201531626 | Wt  |
| TCGA-75-7031-01 | 0 |               | 0 | 0            | 4.201850555 | Wt  |
| TCGA-MP-A4SW-01 | 1 | 59.266666667  | 0 | 59.266666667 | 4.201911165 | Mut |
| TCGA-05-4398-01 | 0 | 47.7          | 0 | 47.7         | 4.202173761 | Wt  |
| TCGA-44-A47G-01 | 0 | 11.7          | 0 | 11.7         | 4.202187574 | Wt  |
| TCGA-86-A4JF-01 | 1 | 24.566666667  | 1 | 14.533333333 | 4.204739584 | Wt  |
| TCGA-78-8648-01 | 1 | 40.3          | 1 | 24           | 4.214786719 | Wt  |
| TCGA-38-7271-01 | 1 | 26.666666667  | 1 | 10.133333333 | 4.216510018 | Wt  |
| TCGA-75-5122-01 | 1 |               | 1 | 0            | 4.21784173  | Wt  |
| TCGA-91-6831-01 | 0 | 10.333333333  | 0 | 10.333333333 | 4.218571122 | Wt  |
| TCGA-55-8301-01 | 0 | 17.8          | 1 | 7.933333333  | 4.220842705 | Wt  |
| TCGA-55-7284-01 | 1 | 8.1           | 1 | 7.7          | 4.224696488 | Wt  |
| TCGA-99-AA5R-01 | 0 | 21.933333333  | 0 | 21.933333333 | 4.227698281 | Wt  |
| TCGA-55-6979-01 | 1 | 7.9           | 1 | 6.5          | 4.235869426 | Wt  |
| TCGA-49-4505-01 | 1 | 14.266666667  | 1 | 13.9         | 4.24084034  | Wt  |
| TCGA-97-8547-01 | 0 | 21.9          | 0 | 21.9         | 4.243470197 | Mut |
| TCGA-69-7760-01 | 0 | 6.733333333   | 0 | 6.733333333  | 4.25208609  | Mut |
| TCGA-62-8397-01 | 0 | 42.966666667  | 0 | 42.966666667 | 4.252646906 | Mut |
| TCGA-73-4662-01 | 0 | 83.833333333  | 1 | 0.7          | 4.254866318 | Wt  |
| TCGA-97-8552-01 | 0 | 20.866666667  | 0 | 20.866666667 | 4.255491552 | Mut |
| TCGA-44-7670-01 | 0 | 29.4          | 0 | 29.4         | 4.255873917 | Wt  |
| TCGA-05-4420-01 | 0 | 30.4          | 0 | 30.4         | 4.256622058 | Wt  |
| TCGA-55-8621-01 | 0 | 17.166666667  | 0 | 17.166666667 | 4.256933256 | Wt  |
| TCGA-78-7537-01 | 1 | 54.066666667  | 0 | 54.066666667 | 4.257314169 | Wt  |
| TCGA-MP-A4T7-01 | 1 | 5.566666667   | 0 | 5.566666667  | 4.266936915 | Wt  |
| TCGA-MP-A4T8-01 | 1 | 5.366666667   | 0 | 5.366666667  | 4.267977405 | Wt  |
| TCGA-55-A48Z-01 | 0 | 21.7          | 1 | 17.866666667 | 4.272420995 | Mut |
| TCGA-80-5611-01 | 0 | 86.5          | 0 | 86.5         | 4.275891341 | Wt  |
| TCGA-55-8507-01 | 0 | 13.933333333  | 0 | 13.933333333 | 4.276587248 | Wt  |
| TCGA-49-6742-01 | 1 | 16.266666667  | 1 | 7.133333333  | 4.276644576 | Wt  |
| TCGA-05-4427-01 | 0 | 26.366666667  | 0 | 26.366666667 | 4.280440189 | Wt  |
| TCGA-50-8459-01 | 0 | 37.3          | 1 | 14.4         | 4.28484243  | Wt  |
| TCGA-97-8177-01 | 0 | 16.633333333  | 0 | 16.633333333 | 4.28972257  | Mut |
| TCGA-49-4486-01 | 1 | 77.266666667  | 1 | 68.166666667 | 4.293589882 | Wt  |
| TCGA-64-1681-01 | 1 | 38.9          | 1 | 14.633333333 | 4.295443083 | Mut |
| TCGA-97-7941-01 | 0 | 16.133333333  | 0 | 16.133333333 | 4.295844214 | Wt  |
| TCGA-55-8205-01 | 0 | 19.966666667  | 1 | 16.5         | 4.295922737 | Wt  |
| TCGA-55-A492-01 | 0 | 19.866666667  | 0 | 19.866666667 | 4.297438232 | Wt  |
| TCGA-05-4430-01 | 0 | 25.366666667  | 0 | 25.366666667 | 4.298498337 | Wt  |
| TCGA-55-6984-01 | 1 | 25.333333333  | 1 | 24.133333333 | 4.299743915 | Wt  |
| TCGA-97-A4LX-01 | 0 | 20.466666667  | 0 | 20.466666667 | 4.300146998 | Wt  |

|                 |   |               |   |               |             |     |
|-----------------|---|---------------|---|---------------|-------------|-----|
| TCGA-97-A4M2-01 | 0 | 20.8          | 0 | 20.8          | 4.306458954 | Wt  |
| TCGA-44-3398-01 | 0 | 38.766666667  | 0 | 38.766666667  | 4.308325561 | Wt  |
| TCGA-97-8179-01 | 0 | 14.5          | 0 | 14.5          | 4.309412514 | Wt  |
| TCGA-91-6848-01 | 0 | 7.466666667   | 0 | 7.466666667   | 4.311188235 | Wt  |
| TCGA-44-2661-01 | 0 | 38.633333333  | 0 | 38.633333333  | 4.318609969 | Mut |
| TCGA-67-3773-01 | 0 | 14.233333333  | 0 | 14.233333333  | 4.320801476 | Wt  |
| TCGA-86-8359-01 | 1 | 14.8          | 0 | 14.8          | 4.321870069 | Wt  |
| TCGA-05-4397-01 | 1 | 24.366666667  | 0 | 24.366666667  | 4.322755471 | Wt  |
| TCGA-55-8505-01 | 0 | 14.666666667  | 0 | 14.666666667  | 4.324625042 | Wt  |
| TCGA-93-A4JO-01 | 1 | 1.1           | 0 | 1.1           | 4.325172321 | Wt  |
| TCGA-49-AAR3-01 | 0 | 63.1          | 1 | 63.1          | 4.329335055 | Wt  |
| TCGA-49-AAR9-01 | 1 | 8.666666667   | 1 | 8.666666667   | 4.329717558 | Wt  |
| TCGA-05-5715-01 | 0 | 2.066666667   | 0 | 2.066666667   | 4.332687234 | Wt  |
| TCGA-55-7911-01 | 0 | 17.9          | 1 | 17.166666667  | 4.337164748 | Wt  |
| TCGA-O1-A52J-01 | 1 | 59.933333333  | 1 | 29.933333333  | 4.338077198 | Wt  |
| TCGA-78-7148-01 | 1 | 20.866666667  | 1 | 6.066666667   | 4.345033659 | Wt  |
| TCGA-L9-A7SV-01 | 0 | 18.833333333  | 0 | 18.833333333  | 4.347254853 | Wt  |
| TCGA-86-A4P7-01 | 0 | 13.833333333  | 0 | 13.833333333  | 4.350333101 | Mut |
| TCGA-75-5126-01 | 0 |               | 0 | 0             | 4.355015404 | Wt  |
| TCGA-MP-A4TI-01 | 1 | 14.3          | 1 | 2.8           | 4.356377305 | Wt  |
| TCGA-MP-A4TK-01 | 1 | 19.4          | 1 | 13.233333333  | 4.356684748 | Wt  |
| TCGA-86-8672-01 | 1 | 0.633333333   | 0 | 0.633333333   | 4.362125665 | Wt  |
| TCGA-55-8085-01 | 0 | 30.133333333  | 0 | 30.133333333  | 4.362276269 | Wt  |
| TCGA-55-8513-01 | 0 | 26.366666667  | 1 | 10.566666667  | 4.36537725  | Wt  |
| TCGA-49-4490-01 | 1 | 12.833333333  | 1 | 12.833333333  | 4.366357724 | Mut |
| TCGA-05-5423-01 | 0 | 5.033333333   | 0 | 5.033333333   | 4.368106028 | Wt  |
| TCGA-93-7347-01 | 0 | 22.766666667  | 0 | 22.766666667  | 4.371272655 | Wt  |
| TCGA-50-5941-01 | 0 | 49.133333333  | 0 | 49.133333333  | 4.372907531 | Wt  |
| TCGA-78-7145-01 | 1 | 27.533333333  | 1 | 14.066666667  | 4.373227676 | Wt  |
| TCGA-93-A4JQ-01 | 0 | 17.533333333  | 0 | 17.533333333  | 4.374868037 | Wt  |
| TCGA-44-6146-01 | 0 | 24.266666667  | 1 | 21.033333333  | 4.380606637 | Wt  |
| TCGA-73-4670-01 | 0 | 4.366666667   | 0 | 4.366666667   | 4.381214187 | Wt  |
| TCGA-78-7542-01 | 1 | 10.7          | 0 | 10.7          | 4.383673163 | Wt  |
| TCGA-78-7536-01 | 1 | 8.133333333   | 1 | 7.7           | 4.384773252 | Wt  |
| TCGA-91-8497-01 | 1 | 14.466666667  | 0 | 14.466666667  | 4.385920683 | Wt  |
| TCGA-44-3918-01 | 0 | 34.533333333  | 1 | 17.033333333  | 4.386993219 | Wt  |
| TCGA-55-7907-01 | 1 | 11.433333333  | 1 | 9.8           | 4.389759817 | Wt  |
| TCGA-MP-A4T4-01 | 1 | 87.233333333  | 0 | 87.233333333  | 4.392897508 | Wt  |
| TCGA-55-6972-01 | 1 | 54.4          | 0 | 54.4          | 4.394455985 | Wt  |
| TCGA-NJ-A4YP-01 | 0 | 1.666666667   | 0 | 1.666666667   | 4.395358885 | Wt  |
| TCGA-55-8514-01 | 0 | 17.333333333  | 0 | 17.333333333  | 4.406459429 | Wt  |
| TCGA-49-AARO-01 | 0 | 125.3         | 1 | 38.133333333  | 4.408540102 | Wt  |
| TCGA-53-7813-01 | 0 | 14.133333333  | 0 | 14.133333333  | 4.40994241  | Wt  |
| TCGA-MP-A4SY-01 | 1 | 50.033333333  | 1 | 16.3          | 4.411284994 | Wt  |
| TCGA-55-8619-01 | 0 | 13.866666667  | 0 | 13.866666667  | 4.421488442 | Wt  |
| TCGA-62-8398-01 | 1 | 14.8          | 0 | 14.8          | 4.424364053 | Wt  |
| TCGA-50-6593-01 | 1 | 11.2          | 1 | 8.866666667   | 4.428026357 | Wt  |
| TCGA-55-6980-01 | 0 | 70.3          | 0 | 70.3          | 4.429755914 | Mut |
| TCGA-97-8175-01 | 0 | 18.366666667  | 1 | 9.8           | 4.433003752 | Wt  |
| TCGA-69-7980-01 | 0 | 13.7          | 0 | 13.7          | 4.442417526 | Wt  |
| TCGA-05-4424-01 | 0 | 30.433333333  | 1 | 5.1           | 4.447485556 | Wt  |
| TCGA-62-A472-01 | 0 | 30.333333333  | 1 | 9.666666667   | 4.448269175 | Wt  |
| TCGA-64-1680-01 | 0 | 37.533333333  | 0 | 37.533333333  | 4.45198318  | Wt  |
| TCGA-49-AARR-01 | 0 | 166.4         | 1 | 36.633333333  | 4.453867958 | Wt  |
| TCGA-78-8655-01 | 0 | 78.666666667  | 0 | 78.666666667  | 4.456406688 | Wt  |
| TCGA-78-7535-01 | 1 | 31.633333333  | 1 | 26.966666667  | 4.459549038 | Wt  |
| TCGA-78-7149-01 | 0 | 131.333333333 | 0 | 131.333333333 | 4.468697392 | Wt  |
| TCGA-86-A4P8-01 | 0 | 26.833333333  | 0 | 26.833333333  | 4.473053577 | Wt  |
| TCGA-NJ-A4YG-01 | 0 | 75.366666667  | 0 | 75.366666667  | 4.473883613 | Wt  |
| TCGA-64-5779-01 | 0 | 28.8          | 1 | 26.5          | 4.474133484 | Wt  |
| TCGA-MN-A4N4-01 | 0 | 39.166666667  | 0 | 39.166666667  | 4.475099359 | Wt  |
| TCGA-62-8402-01 | 1 | 49.933333333  | 1 | 25.733333333  | 4.480039258 | Mut |
| TCGA-05-4250-01 | 1 | 4.033333333   | 0 | 4.033333333   | 4.489615325 | Wt  |

|                 |   |               |   |               |             |     |
|-----------------|---|---------------|---|---------------|-------------|-----|
| TCGA-38-4626-01 | 0 | 122.466666667 | 1 | 83.933333333  | 4.496782326 | Wt  |
| TCGA-44-6145-01 | 0 | 19.833333333  | 0 | 19.833333333  | 4.499832782 | Wt  |
| TCGA-64-1679-01 | 0 | 82.933333333  | 0 | 82.933333333  | 4.501660303 | Wt  |
| TCGA-97-A4M7-01 | 0 | 20.966666667  | 0 | 20.966666667  | 4.502675929 | Mut |
| TCGA-97-A4M5-01 | 0 | 21.133333333  | 0 | 21.133333333  | 4.502714762 | Wt  |
| TCGA-78-7161-01 | 1 | 9.7           | 1 | 5.4           | 4.504760598 | Wt  |
| TCGA-44-2657-01 | 0 | 45.033333333  | 0 | 45.033333333  | 4.518771405 | Wt  |
| TCGA-69-7979-01 | 0 | 13.6          | 0 | 13.6          | 4.520917495 | Wt  |
| TCGA-44-3396-01 | 0 | 37.666666667  | 0 | 37.666666667  | 4.521471248 | Wt  |
| TCGA-55-7576-01 | 0 | 22.333333333  | 0 | 22.333333333  | 4.522339386 | Wt  |
| TCGA-55-8512-01 | 1 | 20.233333333  | 1 | 20.233333333  | 4.522570151 | Wt  |
| TCGA-91-8496-01 | 0 | 16.833333333  | 0 | 16.833333333  | 4.522682592 | Wt  |
| TCGA-55-6985-01 | 0 | 41.1          | 0 | 41.1          | 4.534846528 | Wt  |
| TCGA-97-A4M3-01 | 0 | 18            | 1 | 1.8           | 4.535151534 | Wt  |
| TCGA-73-4658-01 | 1 | 53.333333333  | 0 | 53.333333333  | 4.543063754 | Wt  |
| TCGA-55-6642-01 | 0 | 81.633333333  | 0 | 81.633333333  | 4.543221266 | Wt  |
| TCGA-J2-A4AD-01 | 1 | 18.333333333  | 1 | 17.466666667  | 4.543371088 | Wt  |
| TCGA-53-7626-01 | 1 | 30.966666667  | 1 | 28.833333333  | 4.546074255 | Wt  |
| TCGA-73-4675-01 | 1 | 30.733333333  | 1 | 12.033333333  | 4.547653851 | Wt  |
| TCGA-78-8660-01 | 1 | 10.7          | 1 | 8.066666667   | 4.551714504 | Wt  |
| TCGA-35-3615-01 | 0 | 0.466666667   | 0 | 0.466666667   | 4.554814983 | Wt  |
| TCGA-69-7978-01 | 0 | 4.466666667   | 0 | 4.466666667   | 4.557137036 | Wt  |
| TCGA-50-7109-01 | 1 | 10.266666667  | 1 | 0.5           | 4.558200149 | Wt  |
| TCGA-86-8669-01 | 0 | 31.266666667  | 1 | 28.3          | 4.558480082 | Wt  |
| TCGA-95-7039-01 | 0 | 42.4          | 1 | 41.933333333  | 4.558983624 | Mut |
| TCGA-86-7954-01 | 0 | 20.166666667  | 0 | 20.166666667  | 4.560376451 | Wt  |
| TCGA-64-1676-01 | 0 | 57.6          | 0 | 57.6          | 4.560621415 | Wt  |
| TCGA-L4-A4E5-01 | 0 | 19.266666667  | 0 | 19.266666667  | 4.562584578 | Wt  |
| TCGA-97-7547-01 | 0 | 65.5          | 1 | 25.833333333  | 4.568252598 | Wt  |
| TCGA-91-6828-01 | 0 | 10.766666667  | 0 | 10.766666667  | 4.568556943 | Wt  |
| TCGA-64-1677-01 | 1 | 20.933333333  | 1 | 12            | 4.568800879 | Wt  |
| TCGA-55-7815-01 | 0 | 25.766666667  | 1 | 15.533333333  | 4.573403984 | Wt  |
| TCGA-50-5930-01 | 1 | 9.4           | 1 | 5.9           | 4.581915586 | Wt  |
| TCGA-67-3770-01 | 0 | 20.333333333  | 0 | 20.333333333  | 4.584510324 | Mut |
| TCGA-38-4631-01 | 1 | 11.8          | 1 | 11.8          | 4.58583549  | Wt  |
| TCGA-86-8076-01 | 0 | 33.1          | 0 | 33.1          | 4.586874109 | Wt  |
| TCGA-75-7025-01 | 0 | 110.166666667 | 1 | 49.366666667  | 4.59523693  | Mut |
| TCGA-S2-AA1A-01 | 0 | 17.1          | 0 | 17.1          | 4.595415996 | Wt  |
| TCGA-71-8520-01 | 1 | 7             | 1 | 5.966666667   | 4.999837791 | Mut |
| TCGA-50-6590-01 | 1 | 42.933333333  | 0 | 42.933333333  | 4.611261683 | Wt  |
| TCGA-86-7711-01 | 1 | 34.866666667  | 1 | 34.866666667  | 4.614205237 | Wt  |
| TCGA-55-8097-01 | 0 | 15.866666667  | 0 | 15.866666667  | 4.614956922 | Wt  |
| TCGA-86-6851-01 | 0 | 5.966666667   | 0 | 5.966666667   | 4.620912732 | Wt  |
| TCGA-55-6981-01 | 1 | 45.966666667  | 0 | 45.966666667  | 4.621691191 | Mut |
| TCGA-MP-A4TH-01 | 0 | 24.7          | 0 | 24.7          | 4.621719388 | Wt  |
| TCGA-91-6836-01 | 0 | 13.9          | 0 | 13.9          | 4.628235535 | Wt  |
| TCGA-44-6777-01 | 1 | 32.9          | 0 | 32.9          | 4.632987227 | Wt  |
| TCGA-95-7947-01 | 0 | 15.9          | 0 | 15.9          | 4.634117562 | Mut |
| TCGA-50-6594-01 | 1 | 12.333333333  | 1 | 9.5           | 4.635233414 | Wt  |
| TCGA-55-7727-01 | 0 | 3.966666667   | 0 | 3.966666667   | 4.635824308 | Wt  |
| TCGA-53-A4EZ-01 | 0 | 35.7          | 0 | 35.7          | 4.639016403 | Wt  |
| TCGA-78-8662-01 | 1 | 112.033333333 | 1 | 101.466666667 | 4.641027559 | Wt  |
| TCGA-69-7764-01 | 0 | 13.8          | 0 | 13.8          | 4.642272682 | Wt  |
| TCGA-69-7761-01 | 0 | 6.2           | 0 | 6.2           | 4.643194011 | Wt  |
| TCGA-49-AARN-01 | 1 | 37.833333333  | 0 | 37.833333333  | 4.644347367 | Wt  |
| TCGA-NJ-A7XG-01 | 0 | 20.566666667  | 0 | 20.566666667  | 4.645506424 | Wt  |
| TCGA-78-7160-01 | 1 | 23.233333333  | 0 | 23.233333333  | 4.646629909 | Wt  |
| TCGA-75-6214-01 | 1 | 37.166666667  | 1 | 13.966666667  | 4.648135034 | Wt  |
| TCGA-62-A46Y-01 | 1 | 13.8          | 1 | 10.466666667  | 4.648279174 | Wt  |
| TCGA-44-7659-01 | 0 | 23.033333333  | 0 | 23.033333333  | 4.648697745 | Wt  |
| TCGA-75-6205-01 | 1 |               | 1 | 0             | 4.64931815  | Wt  |
| TCGA-78-8640-01 | 0 | 235.4         | 0 | 235.4         | 4.649992856 | Wt  |
| TCGA-97-A4M1-01 | 0 | 20.033333333  | 0 | 20.033333333  | 4.650972813 | Mut |

|                 |   |               |   |               |             |     |
|-----------------|---|---------------|---|---------------|-------------|-----|
| TCGA-97-7553-01 | 0 | 62.333333333  | 0 | 62.333333333  | 4.654405222 | Wt  |
| TCGA-97-7552-01 | 0 | 64.4          | 1 | 26.6          | 4.658432681 | Wt  |
| TCGA-50-5072-01 | 1 | 8.333333333   | 1 | 7.1           | 4.662726554 | Wt  |
| TCGA-73-4676-01 | 1 | 9.366666667   | 1 | 9.366666667   | 4.664293423 | Wt  |
| TCGA-55-8090-01 | 1 | 19.933333333  | 1 | 18.266666667  | 4.665473625 | Wt  |
| TCGA-50-6592-01 | 1 | 25.9          | 1 | 25.9          | 4.669415309 | Wt  |
| TCGA-73-7498-01 | 0 | 39.633333333  | 0 | 39.633333333  | 4.671393921 | Wt  |
| TCGA-38-4627-01 | 1 | 38.233333333  | 0 | 38.233333333  | 4.676548937 | Mut |
| TCGA-97-A4M6-01 | 0 | 18.933333333  | 0 | 18.933333333  | 4.680707593 | Mut |
| TCGA-67-3772-01 | 0 | 19.1          | 0 | 19.1          | 4.681345009 | Mut |
| TCGA-44-6146-01 | 0 | 24.266666667  | 1 | 21.033333333  | 4.683094836 | Wt  |
| TCGA-MP-A4T9-01 | 1 | 42.166666667  | 1 | 11.366666667  | 4.686497561 | Mut |
| TCGA-62-8394-01 | 1 | 4.633333333   | 0 | 4.633333333   | 4.690003128 | Mut |
| TCGA-93-A4JP-01 | 0 | 19.266666667  | 1 | 16.566666667  | 4.69428335  | Mut |
| TCGA-05-4244-01 | 0 | 0             | 0 | 0             | 4.70036676  | Wt  |
| TCGA-86-7713-01 | 0 | 38.566666667  | 0 | 38.566666667  | 4.702142701 | Wt  |
| TCGA-55-7910-01 | 0 | 34.666666667  | 1 | 33.933333333  | 4.7060271   | Wt  |
| TCGA-75-7027-01 | 0 | 101.966666667 | 1 | 98.3          | 4.707055745 | Wt  |
| TCGA-78-7162-01 | 1 | 105.633333333 | 1 | 73.933333333  | 4.708340445 | Wt  |
| TCGA-L9-A5IP-01 | 1 | 1.933333333   | 1 | 1.633333333   | 4.708733304 | Wt  |
| TCGA-91-6847-01 | 0 | 28.066666667  | 1 | 25.733333333  | 4.709324042 | Wt  |
| TCGA-78-7153-01 | 0 | 121.166666667 | 0 | 121.166666667 | 4.711345752 | Wt  |
| TCGA-67-6216-01 | 0 | 4.7           | 0 | 4.7           | 4.715366332 | Wt  |
| TCGA-44-2655-01 | 0 | 44.133333333  | 1 | 33.633333333  | 4.72118216  | Wt  |
| TCGA-75-7030-01 | 0 | 0             | 0 | 0             | 4.722509457 | Wt  |
| TCGA-75-5146-01 | 0 | 78.933333333  | 1 | 59.1          | 4.727425149 | Wt  |
| TCGA-69-8254-01 | 0 | 13.633333333  | 0 | 13.633333333  | 4.728114622 | Wt  |
| TCGA-05-4382-01 | 0 | 20.233333333  | 1 | 11.133333333  | 4.731054018 | Mut |
| TCGA-44-2665-01 | 0 | 43.366666667  | 0 | 43.366666667  | 4.738677013 | Wt  |
| TCGA-44-2656-01 | 0 | 47.633333333  | 1 | 18.933333333  | 4.738802656 | Wt  |
| TCGA-05-4434-01 | 1 | 15.233333333  | 0 | 15.233333333  | 4.73955148  | Wt  |
| TCGA-75-6212-01 | 1 | 50.533333333  | 1 | 44.666666667  | 4.741073224 | Wt  |
| TCGA-55-7227-01 | 1 | 31.733333333  | 1 | 8.5           | 4.744510306 | Wt  |
| TCGA-97-A4M0-01 | 0 | 21.733333333  | 0 | 21.733333333  | 4.747353061 | Wt  |
| TCGA-69-7763-01 | 0 | 23            | 0 | 23            | 4.748682415 | Wt  |
| TCGA-55-A48X-01 | 0 | 22.966666667  | 1 | 20.5          | 4.749640801 | Wt  |
| TCGA-78-7154-01 | 1 | 19.766666667  | 0 | 19.766666667  | 4.751003986 | Wt  |
| TCGA-55-6970-01 | 1 | 15.466666667  | 1 | 15.233333333  | 4.753674937 | Wt  |
| TCGA-93-A4JN-01 | 0 | 23.933333333  | 0 | 23.933333333  | 4.75704398  | Wt  |
| TCGA-44-2668-01 | 1 | 25.366666667  | 1 | 14.433333333  | 4.757991926 | Wt  |
| TCGA-55-1596-01 | 0 | 68.833333333  | 0 | 68.833333333  | 4.760558008 | Wt  |
| TCGA-05-4249-01 | 0 | 50.766666667  | 0 | 50.766666667  | 4.760932814 | Wt  |
| TCGA-44-3919-01 | 1 | 34.2          | 1 | 30.7          | 4.76464565  | Wt  |
| TCGA-NJ-A55A-01 | 0 | 0.5           | 0 | 0.5           | 4.769478023 | Wt  |
| TCGA-44-7671-01 | 0 | 29.633333333  | 1 | 29.433333333  | 4.769791423 | Wt  |
| TCGA-05-4395-01 | 1 | 0             | 0 | 0             | 4.772928139 | Wt  |
| TCGA-MP-A4T6-01 | 1 | 59.666666667  | 0 | 59.666666667  | 4.7760866   | Wt  |
| TCGA-55-7574-01 | 1 | 33.166666667  | 1 | 15.933333333  | 4.776460269 | Wt  |
| TCGA-49-6744-01 | 0 | 56.1          | 0 | 56.1          | 4.784540261 | Wt  |
| TCGA-91-7771-01 | 0 | 16.4          | 0 | 16.4          | 4.786324456 | Wt  |
| TCGA-55-A48Y-01 | 0 | 21            | 0 | 21            | 4.791273719 | Wt  |
| TCGA-55-6978-01 | 1 | 5.866666667   | 1 | 1.4           | 4.792528771 | Wt  |
| TCGA-55-8206-01 | 0 | 29.6          | 0 | 29.6          | 4.792793356 | Mut |
| TCGA-67-6217-01 | 0 | 14.066666667  | 1 | 9.866666667   | 4.796705907 | Mut |
| TCGA-55-7725-01 | 0 | 14.733333333  | 0 | 14.733333333  | 4.798975352 | Wt  |
| TCGA-55-8204-01 | 0 | 17.166666667  | 0 | 17.166666667  | 4.800083459 | Wt  |
| TCGA-44-7661-01 | 1 | 18.566666667  | 1 | 11.166666667  | 4.803957936 | Wt  |
| TCGA-55-7816-01 | 1 | 15.6          | 1 | 15.6          | 4.807868143 | Wt  |
| TCGA-67-3771-01 | 0 | 20.333333333  | 0 | 20.333333333  | 4.8099124   | Mut |
| TCGA-49-4501-01 | 1 | 47.366666667  | 1 | 18.166666667  | 4.8120311   | Mut |
| TCGA-69-8253-01 | 0 | 14.2          | 0 | 14.2          | 4.816055249 | Wt  |
| TCGA-55-7913-01 | 1 | 18.7          | 1 | 16            | 4.817528024 | Wt  |
| TCGA-05-4384-01 | 0 | 14.2          | 1 | 6.1           | 4.81870719  | Wt  |

|                 |   |               |   |              |             |     |
|-----------------|---|---------------|---|--------------|-------------|-----|
| TCGA-97-8172-01 | 0 | 18.166666667  | 0 | 18.166666667 | 4.821709707 | Wt  |
| TCGA-55-8089-01 | 1 | 23.4          | 0 | 23.4         | 4.824775268 | Wt  |
| TCGA-69-7765-01 | 0 | 5.5           | 0 | 5.5          | 4.828708727 | Mut |
| TCGA-78-7152-01 | 1 | 40.5          | 1 | 40.066666667 | 4.832302358 | Wt  |
| TCGA-55-8299-01 | 1 | 15.633333333  | 1 | 9.133333333  | 4.836331888 | Wt  |
| TCGA-55-6982-01 | 1 | 33.166666667  | 1 | 6.1          | 4.841350903 | Wt  |
| TCGA-86-8075-01 | 1 | 23.133333333  | 1 | 6.633333333  | 4.845065301 | Mut |
| TCGA-67-6215-01 | 0 | 5.8           | 0 | 5.8          | 4.851195205 | Wt  |
| TCGA-MP-A4SV-01 | 1 | 87.333333333  | 0 | 87.333333333 | 4.851228346 | Wt  |
| TCGA-86-8056-01 | 0 | 4.633333333   | 0 | 4.633333333  | 4.854426707 | Wt  |
| TCGA-50-5946-01 | 0 | 53.9          | 1 | 7.366666667  | 4.854595991 | Wt  |
| TCGA-69-A59K-01 | 0 | 19.7          | 0 | 19.7         | 4.863408701 | Wt  |
| TCGA-86-8073-01 | 0 | 24.666666667  | 0 | 24.666666667 | 4.863872371 | Wt  |
| TCGA-05-4405-01 | 0 | 20.333333333  | 0 | 20.333333333 | 4.867914161 | Wt  |
| TCGA-44-2666-01 | 1 | 3.233333333   | 1 | 3.233333333  | 4.869504209 | Wt  |
| TCGA-86-8055-01 | 1 | 4.133333333   | 0 | 4.133333333  | 4.871081024 | Mut |
| TCGA-44-2656-01 | 0 | 47.633333333  | 1 | 18.933333333 | 4.874339769 | Wt  |
| TCGA-55-7570-01 | 0 | 27.466666667  | 0 | 27.466666667 | 4.875605544 | Mut |
| TCGA-J2-A4AE-01 | 0 | 35.966666667  | 0 | 35.966666667 | 4.877619178 | Wt  |
| TCGA-44-7662-01 | 0 | 7.266666667   | 0 | 7.266666667  | 4.890130378 | Wt  |
| TCGA-55-8616-01 | 0 | 1.6           | 0 | 1.6          | 4.891825946 | Mut |
| TCGA-J2-8194-01 | 0 | 24.133333333  | 1 | 15.666666667 | 4.896258359 | Wt  |
| TCGA-73-A9RS-01 | 1 | 11.333333333  | 1 | 3.566666667  | 4.900164752 | Wt  |
| TCGA-78-7146-01 | 1 | 5.766666667   | 0 | 5.766666667  | 4.904183354 | Wt  |
| TCGA-50-5935-01 | 1 | 21.766666667  | 0 | 21.766666667 | 4.905568511 | Wt  |
| TCGA-55-8096-01 | 1 | 23.966666667  | 1 | 18.866666667 | 4.906464614 | Mut |
| TCGA-44-2666-01 | 1 | 3.233333333   | 1 | 3.233333333  | 4.910745764 | Wt  |
| TCGA-78-7147-01 | 1 | 19.533333333  | 1 | 19.266666667 | 4.917487399 | Mut |
| TCGA-93-7348-01 | 0 | 17.7          | 0 | 17.7         | 4.917819187 | Wt  |
| TCGA-44-2668-01 | 1 | 25.366666667  | 1 | 14.433333333 | 4.920347368 | Wt  |
| TCGA-55-8091-01 | 0 | 20            | 0 | 20           | 4.923928798 | Wt  |
| TCGA-67-4679-01 | 0 | 14.933333333  | 0 | 14.933333333 | 4.926101982 | Wt  |
| TCGA-05-4426-01 | 0 | 26.366666667  | 1 | 15.233333333 | 4.926528853 | Wt  |
| TCGA-44-6147-01 | 0 | 28.166666667  | 0 | 28.166666667 | 4.926685987 | Wt  |
| TCGA-62-A46V-01 | 0 | 73.3          | 0 | 73.3         | 4.930434697 | Wt  |
| TCGA-71-6725-01 | 0 | 8.533333333   | 1 | 5.466666667  | 4.930467475 | Wt  |
| TCGA-44-6775-01 | 0 | 23.5          | 1 | 22.8         | 4.93409749  | Wt  |
| TCGA-99-7458-01 | 0 | 24.9          | 0 | 24.9         | 4.937231542 | Wt  |
| TCGA-73-4668-01 | 0 | 15.566666667  | 1 | 7.866666667  | 4.940102504 | Wt  |
| TCGA-95-7562-01 | 1 | 2.9           | 0 | 2.9          | 4.941312391 | Wt  |
| TCGA-49-6767-01 | 0 | 22.566666667  | 0 | 22.566666667 | 4.94599395  | Wt  |
| TCGA-44-2662-01 | 0 | 42.666666667  | 1 | 8.166666667  | 4.950204361 | Wt  |
| TCGA-78-7143-01 | 1 | 165.366666667 | 1 | 50           | 4.95783246  | Wt  |
| TCGA-55-8092-01 | 1 | 5.133333333   | 1 | 4.233333333  | 4.961581376 | Wt  |
| TCGA-55-7914-01 | 1 | 6.233333333   | 1 | 6.233333333  | 4.964927327 | Wt  |
| TCGA-50-5946-02 | 0 | 53.9          | 1 | 7.366666667  | 4.965478611 | Wt  |
| TCGA-86-6562-01 | 1 | 12.533333333  | 1 | 9.133333333  | 4.97292279  | Wt  |
| TCGA-91-6830-01 | 0 | 2             | 1 | 0.6          | 4.978440943 | Wt  |
| TCGA-55-8207-01 | 0 | 32.566666667  | 0 | 32.566666667 | 4.979995586 | Wt  |
| TCGA-95-A4VK-01 | 0 | 21.7          | 1 | 16.533333333 | 4.980037705 | Wt  |
| TCGA-J2-A4AG-01 | 0 | 32.933333333  | 0 | 32.933333333 | 4.980259394 | Wt  |
| TCGA-44-2662-01 | 0 | 42.666666667  | 1 | 8.166666667  | 4.981981981 | Wt  |
| TCGA-83-5908-01 | 0 | 27.466666667  | 0 | 27.466666667 | 4.987142824 | Wt  |
| TCGA-78-7633-01 | 1 | 50.933333333  | 1 | 48.333333333 | 4.988940595 | Wt  |
| TCGA-05-4396-01 | 1 | 10.1          | 0 | 10.1         | 4.995638464 | Wt  |
| TCGA-50-5066-02 | 0 | 48.066666667  | 1 | 15.9         | 4.99638551  | Wt  |
| TCGA-44-4112-01 | 1 | 26.933333333  | 1 | 20.633333333 | 5.009607515 | Wt  |
| TCGA-MP-A4TF-01 | 1 | 11.2          | 1 | 6.5          | 5.015175569 | Wt  |
| TCGA-62-A46O-01 | 1 | 48.466666667  | 1 | 31.433333333 | 5.025343711 | Wt  |
| TCGA-67-3774-01 | 0 | 12.833333333  | 0 | 12.833333333 | 5.025970966 | Wt  |
| TCGA-44-6774-01 | 0 | 21.933333333  | 0 | 21.933333333 | 5.027356928 | Wt  |
| TCGA-55-6975-01 | 1 | 3.933333333   | 1 | 3.933333333  | 5.033260007 | Wt  |
| TCGA-91-6840-01 | 0 | 12.4          | 0 | 12.4         | 5.037101114 | Wt  |

|                 |   |              |   |              |             |     |
|-----------------|---|--------------|---|--------------|-------------|-----|
| TCGA-44-6775-01 | 0 | 23.5         | 1 | 22.8         | 5.039657179 | Wt  |
| TCGA-86-8280-01 | 0 | 23.366666667 | 0 | 23.366666667 | 5.051187033 | Mut |
| TCGA-NJ-A4YI-01 | 1 | 0.133333333  | 0 | 0.133333333  | 5.054954405 | Wt  |
| TCGA-38-4630-01 | 1 | 35.766666667 | 1 | 17.466666667 | 5.061509484 | Wt  |
| TCGA-78-7163-01 | 0 | 241.6        | 0 | 241.6        | 5.062946681 | Wt  |
| TCGA-75-6207-01 | 1 |              | 0 | 0            | 5.06711881  | Wt  |
| TCGA-55-8087-01 | 0 | 15.4         | 0 | 15.4         | 5.077504386 | Wt  |
| TCGA-86-8281-01 | 0 | 0            | 0 | 0            | 5.081685938 | Wt  |
| TCGA-44-2668-01 | 1 | 25.366666667 | 1 | 14.433333333 | 5.085091809 | Wt  |
| TCGA-80-5607-01 | 0 |              | 0 | 0            | 5.086150535 | Wt  |
| TCGA-49-6745-01 | 0 | 17.4         | 0 | 17.4         | 5.098734799 | Wt  |
| TCGA-J2-8192-01 | 0 | 24.633333333 | 1 | 16.066666667 | 5.099077915 | Mut |
| TCGA-55-7724-01 | 0 | 23.5         | 0 | 23.5         | 5.102770593 | Wt  |
| TCGA-95-7948-01 | 0 | 15.866666667 | 0 | 15.866666667 | 5.108568658 | Wt  |
| TCGA-50-6673-01 | 1 | 0.733333333  | 0 | 0.733333333  | 5.110954241 | Wt  |
| TCGA-44-6779-01 | 1 | 16.666666667 | 1 | 7.733333333  | 5.112700679 | Wt  |
| TCGA-75-6203-01 | 0 |              | 0 | 0            | 5.115891511 | Wt  |
| TCGA-55-A57B-01 | 0 | 18.2         | 0 | 18.2         | 5.116611607 | Mut |
| TCGA-62-A46R-01 | 1 | 57.5         | 0 | 57.5         | 5.117365529 | Wt  |
| TCGA-55-7726-01 | 0 | 21.733333333 | 0 | 21.733333333 | 5.120665786 | Wt  |
| TCGA-50-6595-01 | 1 | 6.3          | 1 | 6.066666667  | 5.128403301 | Mut |
| TCGA-50-8457-01 | 0 | 37.5         | 0 | 37.5         | 5.132124884 | Wt  |
| TCGA-97-7554-01 | 0 | 25.833333333 | 0 | 25.833333333 | 5.136727641 | Wt  |
| TCGA-55-8614-01 | 0 | 17.866666667 | 0 | 17.866666667 | 5.136777443 | Wt  |
| TCGA-75-5125-01 | 1 | 67.566666667 | 1 | 58.4         | 5.138987579 | Wt  |
| TCGA-50-5933-01 | 1 | 79.766666667 | 0 | 79.766666667 | 5.140783573 | Wt  |
| TCGA-44-3917-01 | 0 | 39.433333333 | 0 | 39.433333333 | 5.141155493 | Wt  |
| TCGA-50-5939-01 | 1 | 15.333333333 | 0 | 15.333333333 | 5.145491623 | Wt  |
| TCGA-55-8511-01 | 0 | 18.4         | 1 | 15.333333333 | 5.150007862 | Wt  |
| TCGA-75-6206-01 | 0 | 86.333333333 | 0 | 86.333333333 | 5.153898434 | Wt  |
| TCGA-MP-A4TA-01 | 1 | 31.666666667 | 1 | 24.166666667 | 5.158569107 | Wt  |
| TCGA-44-A47A-01 | 0 | 15.533333333 | 1 | 13.233333333 | 5.163500786 | Wt  |
| TCGA-05-4410-01 | 0 | 0            | 0 | 0            | 5.165765243 | Mut |
| TCGA-L9-A50W-01 | 1 | 14.733333333 | 1 | 12.966666667 | 5.196222253 | Mut |
| TCGA-44-3918-01 | 0 | 34.533333333 | 1 | 17.033333333 | 5.198289209 | Wt  |
| TCGA-50-5944-01 | 0 | 58.333333333 | 0 | 58.333333333 | 4.206944192 | Mut |
| TCGA-44-6147-01 | 0 | 28.166666667 | 0 | 28.166666667 | 5.233683289 | Wt  |
| TCGA-73-4677-01 | 1 | 1.266666667  | 1 | 1.266666667  | 5.235813704 | Wt  |
| TCGA-55-6543-01 | 0 | 14.5         | 0 | 14.5         | 5.237763492 | Wt  |
| TCGA-50-6591-01 | 1 | 3.966666667  | 1 | 3.966666667  | 5.250530939 | Mut |
| TCGA-MP-A5C7-01 | 0 | 74.933333333 | 0 | 74.933333333 | 5.254997819 | Wt  |
| TCGA-86-8668-01 | 0 | 14.1         | 0 | 14.1         | 5.255279374 | Mut |
| TCGA-69-7974-01 | 0 | 6.133333333  | 0 | 6.133333333  | 5.257465164 | Wt  |
| TCGA-44-A4SU-01 | 1 | 13.633333333 | 1 | 8.666666667  | 5.262213592 | Mut |
| TCGA-05-4402-01 | 1 | 8.133333333  | 0 | 8.133333333  | 5.272714424 | Mut |
| TCGA-44-8117-01 | 0 | 12.833333333 | 0 | 12.833333333 | 5.295968595 | Wt  |
| TCGA-86-7955-01 | 0 | 35.733333333 | 1 | 27.333333333 | 5.300652216 | Wt  |
| TCGA-86-8278-01 | 0 | 31.466666667 | 1 | 0.966666667  | 5.304885507 | Wt  |
| TCGA-44-8120-01 | 0 | 8.666666667  | 0 | 8.666666667  | 5.307858445 | Wt  |
| TCGA-97-8171-01 | 0 | 18.933333333 | 1 | 14.7         | 5.310662357 | Mut |
| TCGA-78-7158-01 | 1 | 5.966666667  | 1 | 4.4          | 5.322298252 | Mut |
| TCGA-97-7937-01 | 0 | 18.8         | 0 | 18.8         | 5.337336429 | Wt  |
| TCGA-44-5645-01 | 0 | 28.4         | 0 | 28.4         | 5.345560449 | Mut |
| TCGA-05-4422-01 | 0 | 12.166666667 | 0 | 12.166666667 | 5.353010488 | Wt  |
| TCGA-44-6148-01 | 0 | 23.466666667 | 0 | 23.466666667 | 5.365960472 | Wt  |
| TCGA-55-6986-01 | 0 | 108.7        | 0 | 108.7        | 5.36936531  | Wt  |
| TCGA-55-7573-01 | 0 | 16.233333333 | 0 | 16.233333333 | 5.381536178 | Wt  |
| TCGA-50-5936-01 | 1 | 8.566666667  | 1 | 5            | 5.40318397  | Wt  |
| TCGA-86-8279-01 | 0 | 31.633333333 | 0 | 31.633333333 | 5.40688921  | Wt  |
| TCGA-49-6743-01 | 0 | 54.033333333 | 0 | 54.033333333 | 5.412471959 | Mut |
| TCGA-78-7167-01 | 1 | 89.366666667 | 1 | 24.2         | 5.42796714  | Wt  |
| TCGA-44-5645-01 | 0 | 28.4         | 0 | 28.4         | 5.439696988 | Mut |
| TCGA-91-6849-01 | 0 | 1.166666667  | 0 | 1.166666667  | 5.44018912  | Wt  |



|                 |   |              |   |              |             |     |
|-----------------|---|--------------|---|--------------|-------------|-----|
| TCGA-44-6146-01 | 0 | 24.266666667 | 1 | 21.033333333 | 5.45198047  | Wt  |
| TCGA-73-4666-01 | 0 | 26.666666667 | 0 | 26.666666667 | 5.455258435 | Wt  |
| TCGA-55-1592-01 | 1 | 23.366666667 | 1 | 15.066666667 | 5.46364076  | Wt  |
| TCGA-55-A4DG-01 | 0 | 20.266666667 | 0 | 20.266666667 | 5.465035583 | Wt  |
| TCGA-62-8399-01 | 0 | 89.866666667 | 0 | 89.866666667 | 5.475540864 | Wt  |
| TCGA-44-6776-01 | 0 | 87.2         | 0 | 87.2         | 5.483390203 | Wt  |
| TCGA-78-7150-01 | 1 | 22.2         | 1 | 4.633333333  | 5.494285129 | Wt  |
| TCGA-97-7546-01 | 0 | 42.833333333 | 1 | 41.833333333 | 5.511744784 | Wt  |
| TCGA-86-7714-01 | 1 | 20.833333333 | 1 | 20.833333333 | 5.547016885 | Wt  |
| TCGA-55-8506-01 | 0 | 0.366666667  | 0 | 0.366666667  | 5.549529224 | Mut |
| TCGA-78-7156-01 | 1 | 32.533333333 | 0 | 32.533333333 | 5.558827026 | Wt  |
| TCGA-50-5942-01 | 0 | 61.566666667 | 1 | 45.933333333 | 5.584576233 | Wt  |
| TCGA-05-4425-01 | 0 | 22.3         | 0 | 22.3         | 5.596131177 | Wt  |
| TCGA-50-5932-01 | 1 | 41.166666667 | 1 | 36.333333333 | 5.607266764 | Wt  |
| TCGA-05-5425-01 | 0 | 29.4         | 1 | 16.2         | 5.623740392 | Wt  |
| TCGA-91-6829-01 | 1 | 41.933333333 | 0 | 41.933333333 | 5.62959823  | Wt  |
| TCGA-99-8033-01 | 1 | 21.866666667 | 1 | 21.866666667 | 5.677005426 | Wt  |
| TCGA-97-7938-01 | 1 | 0.6          | 0 | 0.6          | 5.684384139 | Wt  |
| TCGA-44-6775-01 | 0 | 23.5         | 1 | 22.8         | 5.691767192 | Wt  |
| TCGA-44-2666-01 | 1 | 3.233333333  | 1 | 3.233333333  | 5.692384244 | Wt  |
| TCGA-78-7539-01 | 0 | 26.366666667 | 1 | 22.933333333 | 5.693512312 | Wt  |
| TCGA-MP-A4TC-01 | 1 | 2.466666667  | 0 | 2.466666667  | 5.750976962 | Wt  |
| TCGA-44-2662-01 | 0 | 42.666666667 | 1 | 8.166666667  | 5.760679281 | Wt  |
| TCGA-38-6178-01 | 0 | 14.933333333 | 0 | 14.933333333 | 5.781469551 | Mut |
| TCGA-55-6712-01 | 1 | 5.7          | 1 | 5.7          | 5.796375897 | Wt  |
| TCGA-44-2656-01 | 0 | 47.633333333 | 1 | 18.933333333 | 5.838726573 | Wt  |
| TCGA-64-5775-01 | 1 | 2.066666667  | 1 | 2.066666667  | 5.844559767 | Wt  |
| TCGA-44-A47B-01 | 0 | 9.566666667  | 0 | 9.566666667  | 5.915979843 | Wt  |
| TCGA-05-4415-01 | 1 | 3.033333333  | 1 | 2            | 5.931133699 | Wt  |
| TCGA-44-5645-01 | 0 | 28.4         | 0 | 28.4         | 5.941481214 | Mut |
| TCGA-55-7994-01 | 0 | 20.1         | 0 | 20.1         | 5.950084562 | Wt  |
| TCGA-44-6147-01 | 0 | 28.166666667 | 0 | 28.166666667 | 6.001354575 | Wt  |
| TCGA-97-8174-01 | 1 | 5.466666667  | 0 | 5.466666667  | 6.005339689 | Wt  |
| TCGA-78-7155-01 | 1 | 39.033333333 | 1 | 6.966666667  | 6.007145552 | Mut |
| TCGA-53-7624-01 | 1 | 34.766666667 | 1 | 13.333333333 | 6.307631825 | Wt  |
| TCGA-44-2659-01 | 0 | 45.566666667 | 1 | 38.2         | 6.50191913  | Wt  |
| TCGA-95-7567-01 | 0 | 18.933333333 | 0 | 18.933333333 | 7.164023776 | Wt  |

---

## GSE11969

| Accession | ch1_Status | ch1_Survival<br>(days) | ch1_Survival<br>(months) | ch1_EGFR<br>status | YAP1         |
|-----------|------------|------------------------|--------------------------|--------------------|--------------|
| GSM303109 | Dead       | 790                    | 26.33333333              | Wt                 | -0.324649708 |
| GSM303020 | Alive      | 2974                   | 99.13333333              | Wt                 | -0.233977529 |
| GSM303108 | Dead       | 229                    | 7.633333333              | Wt                 | -0.223820653 |
| GSM303141 | Dead       | 1862                   | 62.06666667              | Wt                 | -0.201105938 |
| GSM302999 | Alive      | 3214                   | 107.1333333              | Wt                 | -0.19752348  |
| GSM303009 | Dead       | 694                    | 23.13333333              | Wt                 | -0.171200198 |
| GSM303120 | Dead       | 1554                   | 51.8                     | Wt                 | -0.167836592 |
| GSM303019 | Alive      | 3170                   | 105.6666667              | Wt                 | -0.160279019 |
| GSM303073 | Dead       | 1008                   | 33.6                     | Wt                 | -0.157276402 |
| GSM303006 | Alive      | 3295                   | 109.8333333              | Mut                | -0.137173457 |
| GSM303008 | Dead       | 1855                   | 61.83333333              | Mut                | -0.135333272 |
| GSM303074 | Dead       | 1201                   | 40.03333333              | Wt                 | -0.130795899 |
| GSM303130 | Alive      | 2705                   | 90.16666667              | Wt                 | -0.126243339 |
| GSM303011 | Alive      | 3169                   | 105.6333333              | Wt                 | -0.121332452 |
| GSM303142 | Dead       | 683                    | 22.76666667              | Wt                 | -0.120912705 |
| GSM303027 | Alive      | 2701                   | 90.03333333              | Wt                 | -0.119236803 |
| GSM303105 | Dead       | 374                    | 12.46666667              | Wt                 | -0.10982187  |
| GSM303084 | Dead       | 906                    | 30.2                     | Wt                 | -0.10482786  |
| GSM303114 | Dead       | 2196                   | 73.2                     | Wt                 | -0.10278679  |
| GSM303104 | Alive      | 2521                   | 84.03333333              | Wt                 | -0.10274043  |
| GSM303077 | Alive      | 2335                   | 77.83333333              | Wt                 | -0.099263599 |
| GSM303089 | Alive      | 3066                   | 102.2                    | Wt                 | -0.098220746 |
| GSM303133 | Dead       | 139                    | 4.633333333              | Wt                 | -0.093638022 |
| GSM303010 | Alive      | 3246                   | 108.2                    | Wt                 | -0.090044185 |
| GSM303038 | Alive      | 2426                   | 80.86666667              | Wt                 | -0.085230525 |
| GSM303129 | Dead       | 888                    | 29.6                     | Wt                 | -0.08347518  |
| GSM303101 | Dead       | 134                    | 4.466666667              | Wt                 | -0.083260055 |
| GSM303059 | Alive      | 2533                   | 84.43333333              | Wt                 | -0.079962391 |
| GSM303004 | Dead       | 511                    | 17.03333333              | Mut                | -0.077426991 |
| GSM303048 | Dead       | 784                    | 26.13333333              | Wt                 | -0.076106321 |
| GSM303024 | Alive      | 2979                   | 99.3                     | Wt                 | -0.072744404 |
| GSM303005 | Alive      | 3245                   | 108.1666667              | Wt                 | -0.071783302 |
| GSM303013 | Dead       | 1030                   | 34.33333333              | Wt                 | -0.07147457  |
| GSM303015 | Alive      | 3057                   | 101.9                    | Wt                 | -0.063719969 |
| GSM303116 | Alive      | 3282                   | 109.4                    | Wt                 | -0.062932703 |
| GSM303102 | Dead       | 1454                   | 48.46666667              | Wt                 | -0.062036225 |
| GSM303087 | Dead       | 309                    | 10.3                     | Wt                 | -0.052860422 |
| GSM303002 | Alive      | 3245                   | 108.1666667              | Mut                | -0.051561214 |
| GSM303125 | Dead       | 445                    | 14.83333333              | Wt                 | -0.048563399 |
| GSM303046 | Alive      | 2702                   | 90.06666667              | Wt                 | -0.048172444 |
| GSM303119 | Alive      | 2998                   | 99.93333333              | Wt                 | -0.047557714 |
| GSM303052 | Dead       | 1880                   | 62.66666667              | Mut                | -0.042866666 |
| GSM303121 | Dead       | 232                    | 7.733333333              | Wt                 | -0.042249833 |

|           |       |      |             |     |              |
|-----------|-------|------|-------------|-----|--------------|
| GSM303127 | Alive | 2886 | 96.2        | Wt  | -0.036058185 |
| GSM303003 | Alive | 3274 | 109.1333333 | Wt  | -0.032193996 |
| GSM303012 | Alive | 3161 | 105.3666667 | Wt  | -0.027490279 |
| GSM302996 | Dead  | 1326 | 44.2        | Mut | -0.023526085 |
| GSM303023 | Alive | 2873 | 95.76666667 | Wt  | -0.022961449 |
| GSM303047 | Alive | 2456 | 81.86666667 | Wt  | -0.022224175 |
| GSM303039 | Dead  | 2193 | 73.1        | Wt  | -0.021113876 |
| GSM303060 | Alive | 2528 | 84.26666667 | Wt  | -0.020294087 |
| GSM303136 | Dead  | 25   | 0.833333333 | Wt  | -0.019673782 |
| GSM303131 | Dead  | 2546 | 84.86666667 | Wt  | -0.017054788 |
| GSM303056 | Alive | 2525 | 84.16666667 | Wt  | -0.016315786 |
| GSM303138 | Alive | 2533 | 84.43333333 | Wt  | -0.016175976 |
| GSM303090 | Alive | 3263 | 108.7666667 | Wt  | -0.013190756 |
| GSM303134 | Alive | 2513 | 83.76666667 | Wt  | -0.011946265 |
| GSM303036 | Dead  | 397  | 13.23333333 | Mut | -0.011434889 |
| GSM303016 | Alive | 3182 | 106.0666667 | Wt  | -0.007211423 |
| GSM303086 | Dead  | 1425 | 47.5        | Wt  | -0.005334954 |
| GSM303033 | Dead  | 1389 | 46.3        | Mut | -0.004446542 |
| GSM303078 | Dead  | 860  | 28.66666667 | Mut | -0.000885413 |
| GSM303070 | Dead  | 777  | 25.9        | Wt  | 0.001181344  |
| GSM303122 | Alive | 2823 | 94.1        | Wt  | 0.004609064  |
| GSM303064 | Alive | 2521 | 84.03333333 | Mut | 0.004994578  |
| GSM303028 | Dead  | 896  | 29.86666667 | Wt  | 0.005503052  |
| GSM303113 | Dead  | 1565 | 52.16666667 | Wt  | 0.009732259  |
| GSM303035 | Dead  | 361  | 12.03333333 | Mut | 0.011829447  |
| GSM303043 | Alive | 2702 | 90.06666667 | Mut | 0.012131993  |
| GSM303007 | Alive | 3260 | 108.6666667 | Mut | 0.01327219   |
| GSM303079 | Dead  | 186  | 6.2         | Wt  | 0.013592755  |
| GSM303128 | Alive | 2718 | 90.6        | Wt  | 0.014121735  |
| GSM302997 | Alive | 3275 | 109.1666667 | Wt  | 0.014762845  |
| GSM303062 | Alive | 2507 | 83.56666667 | Wt  | 0.0189041    |
| GSM303029 | Alive | 2910 | 97          | Wt  | 0.019932985  |
| GSM303124 | Dead  | 933  | 31.1        | Wt  | 0.022456541  |
| GSM303139 | Alive | 2358 | 78.6        | Wt  | 0.024237149  |
| GSM303094 | Dead  | 660  | 22          | Wt  | 0.025402346  |
| GSM303082 | Dead  | 867  | 28.9        | Wt  | 0.025488267  |
| GSM303041 | Alive | 2355 | 78.5        | Mut | 0.025736147  |
| GSM303025 | Alive | 2905 | 96.83333333 | Wt  | 0.028381052  |
| GSM303014 | Dead  | 2102 | 70.06666667 | Wt  | 0.029452816  |
| GSM302998 | Dead  | 1687 | 56.23333333 | Wt  | 0.030690891  |
| GSM303115 | Alive | 2818 | 93.93333333 | Wt  | 0.033665391  |
| GSM303111 | Alive | 3596 | 119.8666667 | Wt  | 0.034346107  |
| GSM303081 | Dead  | 1074 | 35.8        | Mut | 0.034718225  |
| GSM303080 | Alive | 2342 | 78.06666667 | Wt  | 0.035859159  |
| GSM303069 | Alive | 2341 | 78.03333333 | Wt  | 0.036871894  |
| GSM303144 | Dead  | 795  | 26.5        | Wt  | 0.038730781  |

|           |       |      |              |     |             |
|-----------|-------|------|--------------|-----|-------------|
| GSM303000 | Dead  | 1200 | 40           | Mut | 0.039271062 |
| GSM303034 | Alive | 2796 | 93.2         | Mut | 0.043488619 |
| GSM303040 | Alive | 2797 | 93.23333333  | Mut | 0.045143877 |
| GSM303068 | Dead  | 1229 | 40.96666667  | Wt  | 0.046323133 |
| GSM303021 | Alive | 2879 | 95.96666667  | Mut | 0.047228183 |
| GSM303017 | Alive | 3009 | 100.3        | Wt  | 0.047624856 |
| GSM303095 | Dead  | 422  | 14.06666667  | Wt  | 0.048620655 |
| GSM303051 | Dead  | 2347 | 78.23333333  | Wt  | 0.049396292 |
| GSM303118 | Dead  | 764  | 25.46666667  | Wt  | 0.049674733 |
| GSM303123 | Alive | 2888 | 96.26666667  | Wt  | 0.050683997 |
| GSM303001 | Dead  | 223  | 7.433333333  | Mut | 0.051302385 |
| GSM303137 | Dead  | 25   | 0.8333333333 | Wt  | 0.05327955  |
| GSM303132 | Dead  | 1463 | 48.76666667  | Wt  | 0.054326086 |
| GSM303110 | Alive | 3429 | 114.3        | Wt  | 0.056676269 |
| GSM303022 | Dead  | 1271 | 42.36666667  | Mut | 0.057282031 |
| GSM303018 | Alive | 3004 | 100.1333333  | Wt  | 0.058542251 |
| GSM303076 | Dead  | 749  | 24.96666667  | Mut | 0.059432814 |
| GSM303140 | Dead  | 288  | 9.6          | Wt  | 0.062272988 |
| GSM303107 | Alive | 2353 | 78.43333333  | Wt  | 0.063942865 |
| GSM303099 | Alive | 2712 | 90.4         | Wt  | 0.067072969 |
| GSM303061 | Alive | 2353 | 78.43333333  | Mut | 0.067271037 |
| GSM303097 | Dead  | 297  | 9.9          | Wt  | 0.070447699 |
| GSM303072 | Alive | 2348 | 78.26666667  | Mut | 0.072585948 |
| GSM303032 | Alive | 2932 | 97.73333333  | Mut | 0.07563788  |
| GSM303044 | Dead  | 636  | 21.2         | Wt  | 0.076224185 |
| GSM303058 | Dead  | 1164 | 38.8         | Mut | 0.078273345 |
| GSM303026 | Dead  | 2885 | 96.16666667  | Wt  | 0.07890779  |
| GSM303112 | Dead  | 220  | 7.333333333  | Wt  | 0.080398359 |
| GSM303066 | Alive | 2260 | 75.33333333  | Wt  | 0.084180245 |
| GSM303098 | Dead  | 127  | 4.233333333  | Wt  | 0.088234903 |
| GSM303117 | Alive | 3238 | 107.9333333  | Wt  | 0.088416756 |
| GSM303106 | Alive | 2634 | 87.8         | Wt  | 0.094132423 |
| GSM303037 | Alive | 2506 | 83.53333333  | Wt  | 0.094504531 |
| GSM303050 | Alive | 2520 | 84           | Mut | 0.096207075 |
| GSM303054 | Alive | 2072 | 69.06666667  | Wt  | 0.096748399 |
| GSM303083 | Dead  | 304  | 10.13333333  | Wt  | 0.097586115 |
| GSM303075 | Alive | 1956 | 65.2         | Mut | 0.099328899 |
| GSM303085 | Dead  | 477  | 15.9         | Wt  | 0.106873354 |
| GSM303088 | Dead  | 2428 | 80.93333333  | Mut | 0.109475888 |
| GSM303065 | Dead  | 1501 | 50.03333333  | Mut | 0.10996232  |
| GSM303042 | Alive | 2729 | 90.96666667  | Mut | 0.109965402 |
| GSM303030 | Alive | 2813 | 93.76666667  | Wt  | 0.112454654 |
| GSM303091 | Alive | 3238 | 107.9333333  | Wt  | 0.118687158 |
| GSM303126 | Alive | 2910 | 97           | Wt  | 0.124921821 |
| GSM303053 | Dead  | 2050 | 68.33333333  | Wt  | 0.127170577 |
| GSM303045 | Dead  | 828  | 27.6         | Wt  | 0.127643425 |

|           |       |      |             |     |             |
|-----------|-------|------|-------------|-----|-------------|
| GSM303103 | Alive | 2688 | 89.6        | Mut | 0.139801638 |
| GSM303031 | Alive | 2749 | 91.63333333 | Mut | 0.144041145 |
| GSM303093 | Dead  | 198  | 6.6         | Wt  | 0.152183724 |
| GSM303071 | Dead  | 1333 | 44.43333333 | Wt  | 0.152822879 |
| GSM303063 | Alive | 2519 | 83.96666667 | Mut | 0.159866826 |
| GSM303096 | Alive | 2713 | 90.43333333 | Wt  | 0.160884164 |
| GSM303135 | Dead  | 2528 | 84.26666667 | Wt  | 0.170674668 |
| GSM303067 | Alive | 2339 | 77.96666667 | Wt  | 0.176505549 |
| GSM303057 | Dead  | 482  | 16.06666667 | Wt  | 0.283147351 |
| GSM303049 | Dead  | 596  | 19.86666667 | Wt  | 0.305468283 |
| GSM303055 | Dead  | 440  | 14.66666667 | Wt  | 0.315016784 |
| GSM303100 | Alive | 2681 | 89.36666667 | Wt  | 0.442809561 |
| GSM303092 | Dead  | 75   | 2.5         | Wt  | 0.528135463 |
| GSM303143 | Dead  | 683  | 22.76666667 | Wt  | 0.701515401 |

---

## GSE72094

| Accession  | Vital_status | Survival_time<br>_in_days | Survival_time<br>_in_months | EGFR_status | YAP1     |
|------------|--------------|---------------------------|-----------------------------|-------------|----------|
| GSM1854797 | NA           | NA                        | NA                          | Mut         | 9.099851 |
| GSM1854798 | Alive        | 1249                      | 41.63333333                 | WT          | 9.226885 |
| GSM1854799 | Alive        | 1057                      | 35.23333333                 | WT          | 8.814131 |
| GSM1854800 | Alive        | 1025                      | 34.16666667                 | WT          | 8.87244  |
| GSM1854801 | Alive        | 895                       | 29.83333333                 | WT          | 8.997569 |
| GSM1854802 | Dead         | 922                       | 30.73333333                 | WT          | 9.506766 |
| GSM1854803 | Alive        | 959                       | 31.96666667                 | WT          | 8.751716 |
| GSM1854804 | Alive        | 969                       | 32.3                        | WT          | 8.565    |
| GSM1854805 | Alive        | 833                       | 27.76666667                 | WT          | 8.88976  |
| GSM1854806 | Alive        | 891                       | 29.7                        | WT          | 9.197149 |
| GSM1854807 | Dead         | 524                       | 17.46666667                 | WT          | 8.73646  |
| GSM1854808 | Alive        | 1035                      | 34.5                        | WT          | 9.383468 |
| GSM1854809 | Alive        | 43                        | 1.433333333                 | WT          | 9.471216 |
| GSM1854810 | Alive        | 925                       | 30.83333333                 | WT          | 7.731534 |
| GSM1854811 | Alive        | 1053                      | 35.1                        | Mut         | 10.00251 |
| GSM1854812 | Alive        | 24                        | 0.8                         | WT          | 8.968085 |
| GSM1854813 | Alive        | 825                       | 27.5                        | WT          | 8.360703 |
| GSM1854814 | Alive        | 854                       | 28.46666667                 | WT          | 8.860174 |
| GSM1854815 | Alive        | 820                       | 27.33333333                 | WT          | 8.537586 |
| GSM1854816 | Alive        | 412                       | 13.73333333                 | WT          | 8.313683 |
| GSM1854817 | Alive        | 297                       | 9.9                         | WT          | 9.330482 |
| GSM1854818 | Alive        | 582                       | 19.4                        | WT          | 8.958425 |
| GSM1854819 | Alive        | 28                        | 0.933333333                 | WT          | 8.964916 |
| GSM1854820 | Alive        | 22                        | 0.733333333                 | WT          | 8.566269 |
| GSM1854821 | Alive        | 1260                      | 42                          | Mut         | 8.832343 |
| GSM1854822 | Alive        | 1402                      | 46.73333333                 | WT          | 10.82722 |
| GSM1854823 | Alive        | 799                       | 26.63333333                 | WT          | 9.455572 |
| GSM1854824 | Alive        | NA                        | NA                          | Mut         | 9.75746  |
| GSM1854825 | Alive        | 1329                      | 44.3                        | WT          | 9.16274  |
| GSM1854826 | Alive        | 1488                      | 49.6                        | WT          | 9.234784 |
| GSM1854827 | Alive        | 579                       | 19.3                        | WT          | 8.247477 |
| GSM1854828 | Alive        | 1186                      | 39.53333333                 | WT          | 9.16601  |
| GSM1854829 | Alive        | 1151                      | 38.36666667                 | WT          | 9.01817  |
| GSM1854830 | Alive        | 1323                      | 44.1                        | WT          | 9.034584 |
| GSM1854831 | Dead         | 314                       | 10.46666667                 | WT          | 8.672868 |
| GSM1854832 | Alive        | 1110                      | 37                          | WT          | 9.706945 |
| GSM1854833 | Alive        | 1494                      | 49.8                        | WT          | 8.673906 |
| GSM1854834 | Alive        | 1024                      | 34.13333333                 | Mut         | 8.501016 |
| GSM1854835 | Alive        | 1134                      | 37.8                        | WT          | 8.861037 |
| GSM1854836 | Dead         | 508                       | 16.93333333                 | WT          | 8.800755 |
| GSM1854837 | Dead         | 46                        | 1.533333333                 | WT          | 9.916493 |
| GSM1854838 | Dead         | 1231                      | 41.03333333                 | WT          | 8.227887 |
| GSM1854839 | Alive        | 917                       | 30.56666667                 | Mut         | 9.23688  |
| GSM1854840 | Dead         | 488                       | 16.26666667                 | WT          | 8.603046 |
| GSM1854841 | Alive        | 730                       | 24.33333333                 | WT          | 9.439354 |
| GSM1854842 | Dead         | 1079                      | 35.96666667                 | WT          | 8.668938 |
| GSM1854843 | Alive        | 1127                      | 37.56666667                 | Mut         | 9.55258  |
| GSM1854844 | Dead         | 193                       | 6.433333333                 | WT          | 9.500429 |
| GSM1854845 | Dead         | NA                        | NA                          | WT          | 8.571903 |
| GSM1854846 | Alive        | 833                       | 27.76666667                 | WT          | 9.701096 |
| GSM1854847 | Alive        | 708                       | 23.6                        | WT          | 8.694561 |
| GSM1854848 | Alive        | 1240                      | 41.33333333                 | WT          | 8.583948 |
| GSM1854849 | Alive        | 1465                      | 48.83333333                 | WT          | 9.33247  |
| GSM1854850 | Alive        | 1685                      | 56.16666667                 | WT          | 9.507897 |
| GSM1854851 | Alive        | 1949                      | 64.96666667                 | Mut         | 8.783205 |
| GSM1854852 | Alive        | 1569                      | 52.3                        | Mut         | 9.30496  |
| GSM1854853 | Alive        | 275                       | 9.166666667                 | WT          | 8.926117 |
| GSM1854854 | Alive        | 1507                      | 50.23333333                 | Mut         | 9.533685 |
| GSM1854855 | Dead         | 307                       | 10.23333333                 | WT          | 9.52222  |

|            |       |      |             |     |          |
|------------|-------|------|-------------|-----|----------|
| GSM1854856 | Dead  | 905  | 30.16666667 | WT  | 8.031094 |
| GSM1854857 | Alive | 1388 | 46.26666667 | WT  | 9.190088 |
| GSM1854858 | Dead  | NA   | NA          | WT  | 9.302686 |
| GSM1854859 | Dead  | 814  | 27.13333333 | WT  | 7.838898 |
| GSM1854860 | Dead  | 436  | 14.53333333 | WT  | 8.976737 |
| GSM1854861 | Dead  | 73   | 2.43333333  | WT  | 10.65463 |
| GSM1854862 | Alive | 1596 | 53.2        | WT  | 8.87211  |
| GSM1854863 | Alive | 1488 | 49.6        | WT  | 9.349724 |
| GSM1854864 | Dead  | 398  | 13.26666667 | Mut | 9.344331 |
| GSM1854865 | Alive | 1623 | 54.1        | WT  | 7.824405 |
| GSM1854866 | Alive | 1238 | 41.26666667 | WT  | 8.680008 |
| GSM1854867 | Alive | 1481 | 49.36666667 | WT  | 9.015315 |
| GSM1854868 | Dead  | 430  | 14.33333333 | WT  | 9.869303 |
| GSM1854869 | Alive | 771  | 25.7        | WT  | 9.108859 |
| GSM1854870 | Alive | 1109 | 36.96666667 | WT  | 9.078901 |
| GSM1854871 | Alive | 1120 | 37.33333333 | Mut | 9.059004 |
| GSM1854872 | Alive | 844  | 28.13333333 | WT  | 8.912007 |
| GSM1854873 | Alive | 1086 | 36.2        | WT  | 8.718605 |
| GSM1854874 | Dead  | 871  | 29.03333333 | WT  | 8.973937 |
| GSM1854875 | Alive | 1063 | 35.43333333 | WT  | 8.436293 |
| GSM1854876 | Alive | 907  | 30.23333333 | WT  | 6.939572 |
| GSM1854877 | Alive | 776  | 25.86666667 | WT  | 8.477135 |
| GSM1854878 | NA    | NA   | NA          | Mut | 8.988721 |
| GSM1854879 | Alive | 974  | 32.46666667 | WT  | 9.40172  |
| GSM1854880 | Alive | 852  | 28.4        | WT  | 9.097697 |
| GSM1854881 | Dead  | 732  | 24.4        | WT  | 9.11721  |
| GSM1854882 | Alive | 557  | 18.56666667 | WT  | 9.605862 |
| GSM1854883 | Dead  | 1074 | 35.8        | WT  | 8.635374 |
| GSM1854884 | Dead  | 328  | 10.93333333 | WT  | 8.475591 |
| GSM1854885 | Dead  | 528  | 17.6        | WT  | 9.701739 |
| GSM1854886 | Dead  | 415  | 13.83333333 | WT  | 9.089432 |
| GSM1854887 | Alive | 406  | 13.53333333 | WT  | 8.897952 |
| GSM1854888 | Alive | 840  | 28          | WT  | 9.569073 |
| GSM1854889 | Dead  | 383  | 12.76666667 | WT  | 8.509616 |
| GSM1854890 | Alive | 1112 | 37.06666667 | WT  | 9.133132 |
| GSM1854891 | Dead  | 442  | 14.73333333 | WT  | 9.260076 |
| GSM1854892 | Dead  | 244  | 8.13333333  | WT  | 9.249816 |
| GSM1854893 | Dead  | 3    | 0.1         | WT  | 9.202608 |
| GSM1854894 | NA    | NA   | NA          | WT  | 9.017601 |
| GSM1854895 | Dead  | 313  | 10.43333333 | WT  | 8.947098 |
| GSM1854896 | Dead  | 1045 | 34.83333333 | WT  | 7.975171 |
| GSM1854897 | Dead  | 347  | 11.56666667 | WT  | 8.806149 |
| GSM1854898 | Alive | 16   | 0.53333333  | WT  | 9.429063 |
| GSM1854899 | Dead  | 131  | 4.36666667  | WT  | 9.153653 |
| GSM1854900 | Alive | 907  | 30.23333333 | WT  | 7.781331 |
| GSM1854901 | NA    | NA   | NA          | WT  | 7.878682 |
| GSM1854902 | Alive | 27   | 0.9         | WT  | 9.473649 |
| GSM1854903 | Dead  | 558  | 18.6        | WT  | 8.970533 |
| GSM1854904 | Alive | 1061 | 35.36666667 | WT  | 8.195267 |
| GSM1854905 | NA    | NA   | NA          | WT  | 7.494296 |
| GSM1854906 | Alive | 1146 | 38.2        | WT  | 9.802336 |
| GSM1854907 | Alive | 1070 | 35.66666667 | WT  | 9.28964  |
| GSM1854908 | Alive | 1141 | 38.03333333 | Mut | 8.96191  |
| GSM1854909 | Alive | 889  | 29.63333333 | WT  | 8.999061 |
| GSM1854910 | Alive | 1147 | 38.23333333 | WT  | 8.529213 |
| GSM1854911 | Dead  | 999  | 33.3        | WT  | 9.391904 |
| GSM1854912 | NA    | NA   | NA          | WT  | 9.451543 |
| GSM1854913 | Alive | 676  | 22.53333333 | WT  | 8.661977 |
| GSM1854914 | NA    | NA   | NA          | WT  | 9.227969 |
| GSM1854915 | Alive | 140  | 4.66666667  | WT  | 8.917343 |
| GSM1854916 | Alive | 1153 | 38.43333333 | WT  | 8.6891   |
| GSM1854917 | Alive | 1239 | 41.3        | Mut | 9.590368 |
| GSM1854918 | Alive | 1156 | 38.53333333 | WT  | 9.114251 |

|            |       |      |             |     |          |
|------------|-------|------|-------------|-----|----------|
| GSM1854919 | Alive | 982  | 32.73333333 | Mut | 8.704376 |
| GSM1854920 | Alive | 950  | 31.66666667 | WT  | 8.580546 |
| GSM1854921 | Dead  | 50   | 1.666666667 | WT  | 9.029409 |
| GSM1854922 | Alive | 1150 | 38.33333333 | WT  | 7.937349 |
| GSM1854923 | Alive | 1326 | 44.2        | WT  | 8.443994 |
| GSM1854924 | Alive | 124  | 4.133333333 | Mut | 8.881816 |
| GSM1854925 | Alive | 268  | 8.933333333 | WT  | 8.108461 |
| GSM1854926 | Alive | 262  | 8.733333333 | WT  | 8.162935 |
| GSM1854927 | Dead  | 76   | 2.533333333 | WT  | 8.487679 |
| GSM1854928 | Alive | 1239 | 41.3        | Mut | 8.708558 |
| GSM1854929 | Alive | 683  | 22.76666667 | WT  | 9.409146 |
| GSM1854930 | Alive | 926  | 30.86666667 | WT  | 9.177077 |
| GSM1854931 | Alive | 956  | 31.86666667 | WT  | 8.840576 |
| GSM1854932 | Alive | 802  | 26.73333333 | Mut | 8.919307 |
| GSM1854933 | Alive | 818  | 27.26666667 | WT  | 8.508073 |
| GSM1854934 | Alive | 849  | 28.3        | WT  | 9.704236 |
| GSM1854935 | Dead  | 512  | 17.06666667 | WT  | 9.226603 |
| GSM1854936 | Alive | 962  | 32.06666667 | WT  | 9.83335  |
| GSM1854937 | Alive | 972  | 32.4        | WT  | 9.230293 |
| GSM1854938 | Alive | 79   | 2.633333333 | WT  | 9.970903 |
| GSM1854939 | Alive | NA   | NA          | WT  | 9.518253 |
| GSM1854940 | Alive | 947  | 31.56666667 | WT  | 9.655503 |
| GSM1854941 | Alive | 689  | 22.96666667 | WT  | 9.763297 |
| GSM1854942 | Alive | 527  | 17.56666667 | WT  | 9.013743 |
| GSM1854943 | NA    | NA   | NA          | WT  | 9.062817 |
| GSM1854944 | Alive | 1166 | 38.86666667 | WT  | 8.732088 |
| GSM1854945 | Alive | 1984 | 66.13333333 | WT  | 9.54887  |
| GSM1854946 | Alive | NA   | NA          | WT  | 9.154097 |
| GSM1854947 | Dead  | 281  | 9.366666667 | WT  | 9.896821 |
| GSM1854948 | Dead  | 310  | 10.33333333 | WT  | 9.665676 |
| GSM1854949 | Dead  | NA   | NA          | Mut | 9.112889 |
| GSM1854950 | Alive | 874  | 29.13333333 | WT  | 8.770766 |
| GSM1854951 | Dead  | 80   | 2.666666667 | WT  | 8.182843 |
| GSM1854952 | Alive | 1106 | 36.86666667 | WT  | 9.08285  |
| GSM1854953 | Alive | 1779 | 59.3        | WT  | 9.508658 |
| GSM1854954 | Alive | 996  | 33.2        | WT  | 8.958061 |
| GSM1854955 | Alive | 758  | 25.26666667 | WT  | 9.757831 |
| GSM1854956 | Dead  | 460  | 15.33333333 | WT  | 6.107579 |
| GSM1854957 | Dead  | 283  | 9.433333333 | WT  | 9.297194 |
| GSM1854958 | Alive | 921  | 30.7        | WT  | 9.066954 |
| GSM1854959 | NA    | NA   | NA          | WT  | 8.611041 |
| GSM1854960 | Alive | 949  | 31.63333333 | WT  | 9.636689 |
| GSM1854961 | Dead  | 113  | 3.766666667 | WT  | 9.461845 |
| GSM1854962 | Alive | 808  | 26.93333333 | WT  | 9.295412 |
| GSM1854963 | Dead  | 35   | 1.166666667 | WT  | 9.274907 |
| GSM1854964 | Alive | 642  | 21.4        | WT  | 9.092866 |
| GSM1854965 | Dead  | 680  | 22.66666667 | WT  | 10.07548 |
| GSM1854966 | Dead  | 23   | 0.766666667 | WT  | 8.917599 |
| GSM1854967 | Alive | 924  | 30.8        | WT  | 8.539295 |
| GSM1854968 | NA    | NA   | NA          | WT  | 9.688819 |
| GSM1854969 | Alive | 356  | 11.86666667 | WT  | 8.955727 |
| GSM1854970 | Alive | 392  | 13.06666667 | WT  | 8.625811 |
| GSM1854971 | Alive | 489  | 16.3        | WT  | 8.842271 |
| GSM1854972 | Alive | 919  | 30.63333333 | WT  | 9.057262 |
| GSM1854973 | Alive | 913  | 30.43333333 | Mut | 9.022705 |
| GSM1854974 | Alive | 840  | 28          | Mut | 8.619756 |
| GSM1854975 | Alive | 911  | 30.36666667 | WT  | 8.662713 |
| GSM1854976 | NA    | NA   | NA          | WT  | 8.652368 |
| GSM1854977 | Alive | 692  | 23.06666667 | WT  | 8.60133  |
| GSM1854978 | Dead  | NA   | NA          | WT  | 8.621762 |
| GSM1854979 | Alive | 751  | 25.03333333 | WT  | 8.731385 |
| GSM1854980 | Alive | 749  | 24.96666667 | WT  | 8.138111 |
| GSM1854981 | Dead  | 591  | 19.7        | WT  | 8.69628  |



|            |       |      |             |     |          |
|------------|-------|------|-------------|-----|----------|
| GSM1854982 | Alive | NA   | NA          | WT  | 9.284407 |
| GSM1854983 | Dead  | 116  | 3.866666667 | WT  | 9.59548  |
| GSM1854984 | Alive | 20   | 0.666666667 | WT  | 8.549847 |
| GSM1854985 | Alive | 687  | 22.9        | WT  | 8.992447 |
| GSM1854986 | Alive | 577  | 19.23333333 | WT  | 9.889183 |
| GSM1854987 | Alive | 937  | 31.23333333 | Mut | 9.05373  |
| GSM1854988 | Alive | 785  | 26.16666667 | WT  | 8.825728 |
| GSM1854989 | Alive | 962  | 32.06666667 | WT  | 9.205563 |
| GSM1854990 | Alive | 830  | 27.66666667 | Mut | 9.883342 |
| GSM1854991 | Alive | NA   | NA          | WT  | 8.800814 |
| GSM1854992 | Alive | 554  | 18.46666667 | WT  | 8.873801 |
| GSM1854993 | NA    | NA   | NA          | WT  | 9.508975 |
| GSM1854994 | Alive | 905  | 30.16666667 | Mut | 9.283173 |
| GSM1854995 | Dead  | 496  | 16.53333333 | WT  | 8.664582 |
| GSM1854996 | Dead  | 651  | 21.7        | WT  | 9.583513 |
| GSM1854997 | Dead  | 600  | 20          | WT  | 10.15957 |
| GSM1854998 | Dead  | 852  | 28.4        | WT  | 9.766775 |
| GSM1854999 | Alive | 897  | 29.9        | WT  | 8.473205 |
| GSM1855000 | Alive | 807  | 26.9        | WT  | 9.234313 |
| GSM1855001 | Dead  | 487  | 16.23333333 | WT  | 8.88496  |
| GSM1855002 | NA    | NA   | NA          | WT  | 8.498395 |
| GSM1855003 | Alive | 848  | 28.26666667 | WT  | 8.401257 |
| GSM1855004 | Alive | 1029 | 34.3        | WT  | 8.758684 |
| GSM1855005 | Alive | 977  | 32.56666667 | WT  | 8.833255 |
| GSM1855006 | Alive | 988  | 32.93333333 | WT  | 9.146095 |
| GSM1855007 | Alive | 1130 | 37.66666667 | Mut | 8.584954 |
| GSM1855008 | Alive | 823  | 27.43333333 | WT  | 8.716101 |
| GSM1855009 | Alive | 756  | 25.2        | WT  | 8.774098 |
| GSM1855010 | Alive | 681  | 22.7        | WT  | 8.172714 |
| GSM1855011 | Alive | 1012 | 33.73333333 | WT  | 8.773838 |
| GSM1855012 | Alive | 1079 | 35.96666667 | WT  | 9.684117 |
| GSM1855013 | NA    | NA   | NA          | WT  | 8.094474 |
| GSM1855014 | Dead  | 1119 | 37.3        | WT  | 8.738934 |
| GSM1855015 | Alive | 868  | 28.93333333 | WT  | 8.774109 |
| GSM1855016 | Alive | 994  | 33.13333333 | Mut | 9.233771 |
| GSM1855017 | Dead  | NA   | NA          | WT  | 10.41744 |
| GSM1855018 | Alive | 878  | 29.26666667 | WT  | 8.41826  |
| GSM1855019 | Dead  | 358  | 11.93333333 | WT  | 8.457507 |
| GSM1855020 | Alive | 1189 | 39.63333333 | WT  | 8.592641 |
| GSM1855021 | Alive | 890  | 29.66666667 | WT  | 8.014189 |
| GSM1855022 | Alive | 831  | 27.7        | WT  | 8.87846  |
| GSM1855023 | Alive | 1174 | 39.13333333 | WT  | 8.528942 |
| GSM1855024 | Alive | 1006 | 33.53333333 | WT  | 8.625874 |
| GSM1855025 | Alive | NA   | NA          | WT  | 8.916119 |
| GSM1855026 | Alive | 1038 | 34.6        | WT  | 8.303096 |
| GSM1855027 | Dead  | 837  | 27.9        | WT  | 9.332812 |
| GSM1855028 | Alive | 911  | 30.36666667 | WT  | 7.914101 |
| GSM1855029 | Dead  | 780  | 26          | WT  | 8.45879  |
| GSM1855030 | NA    | NA   | NA          | Mut | 9.215962 |
| GSM1855031 | Alive | 1033 | 34.43333333 | WT  | 8.872519 |
| GSM1855032 | Alive | 818  | 27.26666667 | Mut | 9.510533 |
| GSM1855033 | Alive | 1011 | 33.7        | Mut | 9.832842 |
| GSM1855034 | Alive | 809  | 26.96666667 | WT  | 8.889399 |
| GSM1855035 | Alive | 1074 | 35.8        | WT  | 9.25587  |
| GSM1855036 | Dead  | 932  | 31.06666667 | WT  | 8.947606 |
| GSM1855037 | Alive | 1057 | 35.23333333 | WT  | 8.4499   |
| GSM1855038 | Alive | 871  | 29.03333333 | WT  | 9.264548 |
| GSM1855039 | Dead  | 267  | 8.9         | WT  | 9.553451 |
| GSM1855040 | Alive | 807  | 26.9        | WT  | 8.339844 |
| GSM1855041 | Alive | 373  | 12.43333333 | WT  | 8.697659 |
| GSM1855042 | Alive | 937  | 31.23333333 | WT  | 9.083464 |
| GSM1855043 | Alive | 1029 | 34.3        | WT  | 8.747866 |
| GSM1855044 | Alive | 987  | 32.9        | WT  | 9.444254 |

|            |       |      |             |     |          |
|------------|-------|------|-------------|-----|----------|
| GSM1855045 | Alive | 860  | 28.66666667 | WT  | 8.702441 |
| GSM1855046 | Alive | 939  | 31.3        | WT  | 9.77538  |
| GSM1855047 | Alive | 1019 | 33.96666667 | WT  | 8.359845 |
| GSM1855048 | Dead  | 652  | 21.73333333 | WT  | 9.538899 |
| GSM1855049 | Dead  | 219  | 7.3         | WT  | 8.510384 |
| GSM1855050 | Alive | 698  | 23.26666667 | WT  | 8.647972 |
| GSM1855051 | Alive | 622  | 20.73333333 | WT  | 9.437373 |
| GSM1855052 | Dead  | 951  | 31.7        | WT  | 8.984037 |
| GSM1855053 | Alive | 1015 | 33.83333333 | Mut | 9.891387 |
| GSM1855054 | Alive | 900  | 30          | WT  | 9.669322 |
| GSM1855055 | Alive | 1076 | 35.86666667 | WT  | 8.736675 |
| GSM1855056 | Alive | 1061 | 35.36666667 | WT  | 9.914101 |
| GSM1855057 | Alive | 76   | 2.533333333 | WT  | 9.790379 |
| GSM1855058 | NA    | NA   | NA          | WT  | 8.657075 |
| GSM1855059 | Alive | 588  | 19.6        | Mut | 9.292607 |
| GSM1855060 | Alive | 1033 | 34.43333333 | WT  | 8.775507 |
| GSM1855061 | Dead  | 759  | 25.3        | WT  | 8.810337 |
| GSM1855062 | Dead  | 600  | 20          | WT  | 9.045363 |
| GSM1855063 | Dead  | 349  | 11.63333333 | WT  | 9.364958 |
| GSM1855064 | Alive | 980  | 32.66666667 | WT  | 9.518323 |
| GSM1855065 | Alive | 724  | 24.13333333 | WT  | 8.449454 |
| GSM1855066 | Alive | 997  | 33.23333333 | WT  | 9.303325 |
| GSM1855067 | Alive | 987  | 32.9        | WT  | 9.055422 |
| GSM1855068 | Dead  | 1031 | 34.36666667 | WT  | 8.662406 |
| GSM1855069 | Alive | 305  | 10.16666667 | WT  | 9.617204 |
| GSM1855070 | Alive | 994  | 33.13333333 | Mut | 9.331642 |
| GSM1855071 | Alive | 597  | 19.9        | WT  | 8.513405 |
| GSM1855072 | Alive | 679  | 22.63333333 | WT  | 8.838404 |
| GSM1855073 | Alive | 1042 | 34.73333333 | WT  | 9.152665 |
| GSM1855074 | Alive | 733  | 24.43333333 | WT  | 9.426005 |
| GSM1855075 | Alive | 897  | 29.9        | WT  | 9.087544 |
| GSM1855076 | Alive | 917  | 30.56666667 | WT  | 8.974595 |
| GSM1855077 | Alive | 855  | 28.5        | WT  | 9.144412 |
| GSM1855078 | Alive | 882  | 29.4        | WT  | 8.949082 |
| GSM1855079 | Dead  | 336  | 11.2        | WT  | 8.872517 |
| GSM1855080 | Alive | 671  | 22.36666667 | WT  | 8.76047  |
| GSM1855081 | Alive | 777  | 25.9        | WT  | 10.05013 |
| GSM1855082 | Alive | 595  | 19.83333333 | WT  | 9.25394  |
| GSM1855083 | Alive | 832  | 27.73333333 | WT  | 8.991131 |
| GSM1855084 | Alive | 919  | 30.63333333 | WT  | 9.956692 |
| GSM1855085 | Alive | 971  | 32.36666667 | WT  | 9.433555 |
| GSM1855086 | Alive | 882  | 29.4        | WT  | 10.08199 |
| GSM1855087 | Alive | 938  | 31.26666667 | WT  | 9.426887 |
| GSM1855088 | Alive | 468  | 15.6        | WT  | 9.529674 |
| GSM1855089 | Alive | 834  | 27.8        | WT  | 9.487739 |
| GSM1855090 | NA    | NA   | NA          | Mut | 9.562624 |
| GSM1855091 | Dead  | 936  | 31.2        | WT  | 8.706697 |
| GSM1855092 | Alive | 732  | 24.4        | WT  | 8.869249 |
| GSM1855093 | Alive | 766  | 25.53333333 | WT  | 8.576382 |
| GSM1855094 | Alive | 607  | 20.23333333 | Mut | 8.741239 |
| GSM1855095 | Alive | 578  | 19.26666667 | WT  | 9.703231 |
| GSM1855096 | Alive | 816  | 27.2        | WT  | 7.000216 |
| GSM1855097 | Alive | 853  | 28.43333333 | WT  | 8.510905 |
| GSM1855098 | Alive | 759  | 25.3        | WT  | 8.627658 |
| GSM1855099 | Dead  | 917  | 30.56666667 | WT  | 9.505332 |
| GSM1855100 | Alive | 868  | 28.93333333 | WT  | 8.992259 |
| GSM1855101 | Dead  | 920  | 30.66666667 | Mut | 9.224189 |
| GSM1855102 | Alive | 607  | 20.23333333 | WT  | 8.829236 |
| GSM1855103 | Alive | 568  | 18.93333333 | WT  | 7.199698 |
| GSM1855104 | Dead  | 98   | 3.266666667 | WT  | 7.715828 |
| GSM1855105 | Alive | 555  | 18.5        | Mut | 8.608009 |
| GSM1855106 | Dead  | 306  | 10.2        | WT  | 9.21821  |
| GSM1855107 | Alive | 906  | 30.2        | WT  | 9.068145 |

|            |       |      |             |     |          |
|------------|-------|------|-------------|-----|----------|
| GSM1855108 | Alive | 918  | 30.6        | WT  | 9.637703 |
| GSM1855109 | Dead  | 693  | 23.1        | WT  | 9.171387 |
| GSM1855110 | Alive | 680  | 22.66666667 | Mut | 8.693938 |
| GSM1855111 | Alive | 539  | 17.96666667 | WT  | 9.625321 |
| GSM1855112 | Alive | 820  | 27.33333333 | WT  | 8.302545 |
| GSM1855113 | Alive | 750  | 25          | Mut | 9.606819 |
| GSM1855114 | Alive | 708  | 23.6        | WT  | 9.150829 |
| GSM1855115 | NA    | NA   | NA          | WT  | 8.583315 |
| GSM1855116 | Alive | 672  | 22.4        | WT  | 8.446901 |
| GSM1855117 | Alive | 470  | 15.66666667 | WT  | 9.533998 |
| GSM1855118 | Alive | 54   | 1.8         | WT  | 9.049505 |
| GSM1855119 | Alive | 780  | 26          | WT  | 8.694143 |
| GSM1855120 | Dead  | 216  | 7.2         | WT  | 8.569882 |
| GSM1855121 | Dead  | 294  | 9.8         | WT  | 8.090837 |
| GSM1855122 | Alive | 757  | 25.23333333 | Mut | 8.211009 |
| GSM1855123 | Alive | 760  | 25.33333333 | WT  | 8.615807 |
| GSM1855124 | Alive | 1089 | 36.3        | WT  | 9.289232 |
| GSM1855125 | Dead  | 17   | 0.56666667  | WT  | 8.826455 |
| GSM1855126 | Alive | 577  | 19.23333333 | WT  | 8.883692 |
| GSM1855127 | Alive | 539  | 17.96666667 | WT  | 8.821817 |
| GSM1855128 | Alive | 906  | 30.2        | WT  | 9.050434 |
| GSM1855129 | Alive | 628  | 20.93333333 | WT  | 9.00211  |
| GSM1855130 | Alive | NA   | NA          | WT  | 9.451548 |
| GSM1855131 | Dead  | 696  | 23.2        | WT  | 9.454125 |
| GSM1855132 | Alive | 858  | 28.6        | WT  | 9.17906  |
| GSM1855133 | Alive | 701  | 23.36666667 | WT  | 8.591083 |
| GSM1855134 | Dead  | 382  | 12.73333333 | WT  | 8.375997 |
| GSM1855135 | Alive | 539  | 17.96666667 | WT  | 8.716868 |
| GSM1855136 | Dead  | 4    | 0.13333333  | WT  | 8.210296 |
| GSM1855137 | Alive | 557  | 18.56666667 | WT  | 9.187701 |
| GSM1855138 | Alive | 619  | 20.63333333 | WT  | 9.087733 |
| GSM1855139 | Alive | NA   | NA          | WT  | 7.992938 |
| GSM1855140 | Alive | 830  | 27.66666667 | WT  | 8.812813 |
| GSM1855141 | Alive | 821  | 27.36666667 | WT  | 9.898284 |
| GSM1855142 | Alive | 831  | 27.7        | WT  | 9.163264 |
| GSM1855143 | Alive | 591  | 19.7        | WT  | 8.165349 |
| GSM1855144 | Alive | 850  | 28.33333333 | WT  | 8.517413 |
| GSM1855145 | Dead  | 809  | 26.96666667 | WT  | 8.694493 |
| GSM1855146 | Alive | 142  | 4.73333333  | WT  | 9.377129 |
| GSM1855147 | Alive | 807  | 26.9        | WT  | 8.860173 |
| GSM1855148 | Alive | NA   | NA          | WT  | 9.452085 |
| GSM1855149 | Alive | 832  | 27.73333333 | WT  | 8.973953 |
| GSM1855150 | Dead  | 98   | 3.26666667  | WT  | 8.609361 |
| GSM1855151 | Alive | 798  | 26.6        | WT  | 9.241076 |
| GSM1855152 | Alive | 799  | 26.63333333 | WT  | 9.44518  |
| GSM1855153 | Dead  | 325  | 10.83333333 | WT  | 9.274659 |
| GSM1855154 | NA    | NA   | NA          | WT  | 7.973678 |
| GSM1855155 | Alive | NA   | NA          | WT  | 8.687348 |
| GSM1855156 | Alive | 978  | 32.6        | WT  | 8.263017 |
| GSM1855157 | Alive | 806  | 26.86666667 | WT  | 9.145962 |
| GSM1855158 | Alive | 698  | 23.26666667 | WT  | 9.080448 |
| GSM1855159 | Alive | 861  | 28.7        | Mut | 10.09757 |
| GSM1855160 | Alive | 325  | 10.83333333 | WT  | 9.429445 |
| GSM1855161 | Dead  | 332  | 11.06666667 | WT  | 8.453652 |
| GSM1855162 | Alive | 734  | 24.46666667 | Mut | 10.20527 |
| GSM1855163 | Alive | 867  | 28.9        | WT  | 8.668473 |
| GSM1855164 | Alive | 830  | 27.66666667 | WT  | 8.580675 |
| GSM1855165 | Dead  | 541  | 18.03333333 | WT  | 8.866504 |
| GSM1855166 | Alive | 679  | 22.63333333 | WT  | 8.698965 |
| GSM1855167 | Alive | NA   | NA          | WT  | 9.508729 |
| GSM1855168 | Dead  | 40   | 1.33333333  | WT  | 8.926149 |
| GSM1855169 | Alive | 740  | 24.66666667 | WT  | 8.394851 |
| GSM1855170 | Alive | 540  | 18          | WT  | 9.459166 |

|            |       |      |             |     |          |
|------------|-------|------|-------------|-----|----------|
| GSM1855171 | Alive | 1155 | 38.5        | WT  | 9.281847 |
| GSM1855172 | Alive | 797  | 26.56666667 | WT  | 8.856476 |
| GSM1855173 | Dead  | 676  | 22.53333333 | WT  | 9.030521 |
| GSM1855174 | Alive | 540  | 18          | WT  | 9.576768 |
| GSM1855175 | Dead  | 380  | 12.66666667 | WT  | 8.231805 |
| GSM1855176 | Alive | 1350 | 45          | WT  | 9.352592 |
| GSM1855177 | Alive | 570  | 19          | Mut | 8.383839 |
| GSM1855178 | Dead  | 58   | 1.933333333 | WT  | 9.819593 |
| GSM1855179 | Alive | 5    | 0.166666667 | WT  | 8.745003 |
| GSM1855180 | Alive | 554  | 18.46666667 | WT  | 9.465681 |
| GSM1855181 | Alive | 534  | 17.8        | WT  | 8.858136 |
| GSM1855182 | Alive | 4    | 0.133333333 | Mut | 9.587959 |
| GSM1855183 | Alive | 1692 | 56.4        | WT  | 8.95765  |
| GSM1855184 | Dead  | 223  | 7.433333333 | WT  | 8.710357 |
| GSM1855185 | Alive | 1085 | 36.16666667 | WT  | 9.119427 |
| GSM1855186 | Dead  | NA   | NA          | WT  | 9.621825 |
| GSM1855187 | Dead  | 912  | 30.4        | WT  | 10.11495 |
| GSM1855188 | Dead  | 1357 | 45.23333333 | WT  | 9.437567 |
| GSM1855189 | Dead  | 844  | 28.13333333 | WT  | 9.163622 |
| GSM1855190 | Dead  | 520  | 17.33333333 | WT  | 8.952723 |
| GSM1855191 | Dead  | NA   | NA          | WT  | 9.866543 |
| GSM1855192 | Dead  | 239  | 7.966666667 | WT  | 9.374456 |
| GSM1855193 | Alive | 349  | 11.63333333 | WT  | 9.011456 |
| GSM1855194 | NA    | NA   | NA          | WT  | 8.227216 |
| GSM1855195 | Dead  | 1025 | 34.16666667 | WT  | 10.06806 |
| GSM1855196 | Dead  | 1560 | 52          | WT  | 9.314643 |
| GSM1855197 | Dead  | NA   | NA          | WT  | 8.9792   |
| GSM1855198 | Dead  | 564  | 18.8        | WT  | 9.32724  |
| GSM1855199 | Dead  | 293  | 9.766666667 | WT  | 9.282148 |
| GSM1855200 | Dead  | 1053 | 35.1        | WT  | 8.366611 |
| GSM1855201 | NA    | NA   | NA          | WT  | 9.144288 |
| GSM1855202 | Dead  | 627  | 20.9        | WT  | 9.836526 |
| GSM1855203 | Alive | 395  | 13.16666667 | WT  | 9.54534  |
| GSM1855204 | Dead  | 1007 | 33.56666667 | Mut | 9.53024  |
| GSM1855205 | Alive | NA   | NA          | WT  | 8.681203 |
| GSM1855206 | Dead  | 681  | 22.7        | WT  | 8.651549 |
| GSM1855207 | Alive | 1293 | 43.1        | WT  | 9.796939 |
| GSM1855208 | Dead  | 1293 | 43.1        | WT  | 9.238604 |
| GSM1855209 | Dead  | 968  | 32.26666667 | WT  | 5.572981 |
| GSM1855210 | Alive | 1843 | 61.43333333 | WT  | 8.823246 |
| GSM1855211 | Alive | 1616 | 53.86666667 | WT  | 8.655076 |
| GSM1855212 | Alive | 1559 | 51.96666667 | WT  | 9.243187 |
| GSM1855213 | Alive | 1703 | 56.76666667 | WT  | 8.893663 |
| GSM1855214 | Alive | 1834 | 61.13333333 | WT  | 10.01138 |
| GSM1855215 | Alive | 1551 | 51.7        | WT  | 9.209234 |
| GSM1855216 | Alive | NA   | NA          | WT  | 9.078441 |
| GSM1855217 | Alive | 1554 | 51.8        | Mut | 9.426236 |
| GSM1855218 | Dead  | 489  | 16.3        | WT  | 9.467519 |
| GSM1855219 | Dead  | 216  | 7.2         | WT  | 9.652226 |
| GSM1855220 | Alive | 1510 | 50.33333333 | WT  | 9.490726 |
| GSM1855221 | Alive | 701  | 23.36666667 | WT  | 9.392711 |
| GSM1855222 | Alive | 1363 | 45.43333333 | WT  | 8.767084 |
| GSM1855223 | Dead  | 1135 | 37.83333333 | WT  | 9.139396 |
| GSM1855224 | Dead  | 618  | 20.6        | WT  | 9.321449 |
| GSM1855225 | Dead  | 1037 | 34.56666667 | WT  | 8.810958 |
| GSM1855226 | Alive | 1599 | 53.3        | WT  | 9.337531 |
| GSM1855227 | NA    | NA   | NA          | WT  | 8.922146 |
| GSM1855228 | Dead  | 171  | 5.7         | WT  | 9.167542 |
| GSM1855229 | Alive | 2077 | 69.23333333 | WT  | 8.253573 |
| GSM1855230 | Alive | 1652 | 55.06666667 | WT  | 9.473641 |
| GSM1855231 | Dead  | 489  | 16.3        | WT  | 9.075749 |
| GSM1855232 | Dead  | 762  | 25.4        | WT  | 9.312448 |
| GSM1855233 | Dead  | NA   | NA          | WT  | 9.164859 |

|            |       |      |             |     |          |
|------------|-------|------|-------------|-----|----------|
| GSM1855234 | Alive | 1693 | 56.43333333 | WT  | 10.2286  |
| GSM1855235 | Dead  | 713  | 23.76666667 | Mut | 9.342579 |
| GSM1855236 | Alive | 1652 | 55.06666667 | WT  | 8.910212 |
| GSM1855237 | Dead  | 181  | 6.033333333 | WT  | 9.512869 |
| GSM1855238 | Dead  | 1629 | 54.3        | WT  | 8.560154 |

---























## GSE31210

| Accession | EGFR status     | YAP1        | CD274       |
|-----------|-----------------|-------------|-------------|
| GSM773639 | EGFR mutation + | 12.795492   | 11.13795897 |
| GSM773640 | EGFR mutation + | 13.01457742 | 10.49101368 |
| GSM773641 | EGFR mutation + | 12.71321122 | 11.80146894 |
| GSM773642 | EGFR mutation + | 12.68081266 | 9.848954315 |
| GSM773643 | EGFR mutation + | 12.64922878 | 10.48660809 |
| GSM773644 | EGFR mutation + | 12.84546378 | 10.34026238 |
| GSM773645 | EGFR mutation + | 13.01287695 | 9.606762742 |
| GSM773646 | EGFR mutation + | 13.47014624 | 9.113363995 |
| GSM773647 | EGFR mutation + | 12.90948999 | 9.813399628 |
| GSM773648 | EGFR mutation + | 12.55405278 | 11.17201152 |
| GSM773649 | EGFR mutation + | 12.24701872 | 8.929799577 |
| GSM773650 | EGFR mutation + | 12.72150254 | 11.24651777 |
| GSM773651 | EGFR mutation + | 12.77599189 | 9.275454094 |
| GSM773652 | EGFR mutation + | 12.66641798 | 11.70930429 |
| GSM773653 | EGFR mutation + | 12.43211461 | 10.00355853 |
| GSM773654 | EGFR mutation + | 12.50060216 | 8.52488134  |
| GSM773655 | EGFR mutation + | 13.01895124 | 9.995155324 |
| GSM773656 | EGFR mutation + | 12.62121397 | 10.41279825 |
| GSM773657 | EGFR mutation + | 12.66052276 | 10.94733361 |
| GSM773658 | EGFR mutation + | 12.77727504 | 9.700820456 |
| GSM773659 | EGFR mutation + | 12.83064295 | 9.008821318 |
| GSM773660 | EGFR mutation + | 12.88183723 | 9.933772081 |
| GSM773661 | EGFR mutation + | 12.98237973 | 9.523408662 |
| GSM773662 | EGFR mutation + | 13.04743393 | 9.146847387 |
| GSM773663 | EGFR mutation + | 13.34603192 | 10.05099558 |
| GSM773664 | EGFR mutation + | 13.45912727 | 10.10345909 |
| GSM773665 | EGFR mutation + | 10.8196626  | 9.031147311 |
| GSM773666 | EGFR mutation + | 11.77005101 | 10.05890969 |
| GSM773667 | EGFR mutation + | 12.64847129 | 11.05847845 |
| GSM773668 | EGFR mutation + | 12.77856815 | 9.940435175 |
| GSM773669 | EGFR mutation + | 13.16818477 | 9.757342169 |
| GSM773670 | EGFR mutation + | 12.56685914 | 9.404176365 |
| GSM773671 | EGFR mutation + | 13.04128269 | 11.89436041 |
| GSM773672 | EGFR mutation + | 12.85806358 | 10.12788034 |
| GSM773673 | EGFR mutation + | 13.06750377 | 10.94178498 |
| GSM773674 | EGFR mutation + | 12.85920669 | 10.97349748 |
| GSM773675 | EGFR mutation + | 13.72855341 | 9.072532188 |
| GSM773676 | EGFR mutation + | 13.28066045 | 9.788046332 |
| GSM773677 | EGFR mutation + | 12.95969536 | 10.52902092 |
| GSM773678 | EGFR mutation + | 13.10933819 | 9.340491726 |
| GSM773679 | EGFR mutation + | 12.99080758 | 10.67417779 |
| GSM773680 | EGFR mutation + | 12.78009024 | 11.1061283  |
| GSM773681 | EGFR mutation + | 13.06625488 | 9.107926085 |
| GSM773682 | EGFR mutation + | 12.24065928 | 8.063739669 |
| GSM773683 | EGFR mutation + | 12.22120555 | 11.04411963 |
| GSM773684 | EGFR mutation + | 12.98227561 | 9.273427304 |
| GSM773685 | EGFR mutation + | 13.38393887 | 9.30970121  |
| GSM773686 | EGFR mutation + | 13.55505425 | 8.976250205 |
| GSM773687 | EGFR mutation + | 13.1908099  | 10.02819382 |
| GSM773688 | EGFR mutation + | 13.46745513 | 11.79217014 |
| GSM773689 | EGFR mutation + | 13.30491041 | 10.72670914 |
| GSM773690 | EGFR mutation + | 13.44013868 | 9.871277829 |
| GSM773691 | EGFR mutation + | 13.32140953 | 9.125224887 |
| GSM773692 | EGFR mutation + | 13.0365454  | 11.29760115 |



|           |                 |             |             |
|-----------|-----------------|-------------|-------------|
| GSM773693 | EGFR mutation + | 12.90790783 | 9.521826739 |
| GSM773694 | EGFR mutation + | 13.17074927 | 8.557423493 |
| GSM773695 | EGFR mutation + | 12.86546322 | 10.66722493 |
| GSM773696 | EGFR mutation + | 13.01641118 | 10.04100842 |
| GSM773697 | EGFR mutation + | 12.64757108 | 11.27424949 |
| GSM773698 | EGFR mutation + | 13.44148568 | 8.619797404 |
| GSM773699 | EGFR mutation + | 13.58652188 | 9.247709669 |
| GSM773700 | EGFR mutation + | 13.336968   | 9.990337301 |
| GSM773701 | EGFR mutation + | 13.30462512 | 9.938807269 |
| GSM773702 | EGFR mutation + | 13.11288889 | 9.995022862 |
| GSM773703 | EGFR mutation + | 12.54039252 | 9.63114922  |
| GSM773704 | EGFR mutation + | 13.00365757 | 9.524568159 |
| GSM773705 | EGFR mutation + | 13.32009962 | 9.462473848 |
| GSM773706 | EGFR mutation + | 13.42635217 | 9.022537875 |
| GSM773707 | EGFR mutation + | 13.08763737 | 9.299953218 |
| GSM773708 | EGFR mutation + | 12.65727289 | 8.904035745 |
| GSM773709 | EGFR mutation + | 13.26226988 | 9.220665387 |
| GSM773710 | EGFR mutation + | 12.64981078 | 9.844858734 |
| GSM773711 | EGFR mutation + | 12.78549089 | 9.812475603 |
| GSM773712 | EGFR mutation + | 12.69857619 | 9.297916343 |
| GSM773713 | EGFR mutation + | 12.83888954 | 10.34390544 |
| GSM773714 | EGFR mutation + | 12.86338931 | 10.08793853 |
| GSM773715 | EGFR mutation + | 12.85579256 | 10.2910323  |
| GSM773716 | EGFR mutation + | 12.59336824 | 10.72410307 |
| GSM773717 | EGFR mutation + | 13.33069032 | 9.407581341 |
| GSM773718 | EGFR mutation + | 12.70066295 | 8.838473121 |
| GSM773719 | EGFR mutation + | 13.26765123 | 8.963492042 |
| GSM773720 | EGFR mutation + | 12.75093095 | 9.538882074 |
| GSM773721 | EGFR mutation + | 12.93374616 | 11.53379201 |
| GSM773722 | EGFR mutation + | 13.42302567 | 9.426974185 |
| GSM773723 | EGFR mutation + | 12.74631445 | 10.5203143  |
| GSM773724 | EGFR mutation + | 13.01674614 | 9.744596395 |
| GSM773725 | EGFR mutation + | 12.65506264 | 9.662902605 |
| GSM773726 | EGFR mutation + | 12.90336842 | 11.85370589 |
| GSM773727 | EGFR mutation + | 13.54490528 | 9.506672945 |
| GSM773728 | EGFR mutation + | 13.02921509 | 9.886767169 |
| GSM773729 | EGFR mutation + | 13.05656101 | 9.563864163 |
| GSM773730 | EGFR mutation + | 13.18807726 | 9.314697658 |
| GSM773731 | EGFR mutation + | 12.96393392 | 10.03457161 |
| GSM773732 | EGFR mutation + | 12.58564776 | 10.91629077 |
| GSM773733 | EGFR mutation + | 13.1994081  | 9.693584354 |
| GSM773734 | EGFR mutation + | 13.43359939 | 10.42687012 |
| GSM773735 | EGFR mutation + | 13.55549061 | 9.387155071 |
| GSM773736 | EGFR mutation + | 12.56536536 | 9.630462809 |
| GSM773737 | EGFR mutation + | 13.22174781 | 9.374069414 |
| GSM773738 | EGFR mutation + | 12.90682503 | 9.84896245  |
| GSM773739 | EGFR mutation + | 12.94654044 | 10.20638706 |
| GSM773740 | EGFR mutation + | 13.18126021 | 8.953877777 |
| GSM773741 | EGFR mutation + | 12.96222437 | 11.64786748 |
| GSM773742 | EGFR mutation + | 13.01380628 | 9.571906005 |
| GSM773743 | EGFR mutation + | 12.80625316 | 10.62660906 |
| GSM773744 | EGFR mutation + | 12.4835188  | 10.55395168 |
| GSM773745 | EGFR mutation + | 13.07313872 | 9.216266173 |
| GSM773746 | EGFR mutation + | 12.63705116 | 10.55718959 |
| GSM773747 | EGFR mutation + | 12.80162976 | 9.251993595 |
| GSM773748 | EGFR mutation + | 13.29373071 | 9.940933125 |
| GSM773749 | EGFR mutation + | 13.17743387 | 8.673679729 |
| GSM773750 | EGFR mutation + | 12.95026992 | 9.200145314 |

|           |                 |             |             |
|-----------|-----------------|-------------|-------------|
| GSM773751 | EGFR mutation + | 13.31863022 | 9.325298034 |
| GSM773752 | EGFR mutation + | 13.48604622 | 9.609796323 |
| GSM773753 | EGFR mutation + | 13.34098473 | 9.256159615 |
| GSM773754 | EGFR mutation + | 13.25169631 | 9.529358515 |
| GSM773755 | EGFR mutation + | 13.45550421 | 9.210371817 |
| GSM773756 | EGFR mutation + | 13.64469125 | 9.388459716 |
| GSM773757 | EGFR mutation + | 13.52070424 | 9.834910586 |
| GSM773758 | EGFR mutation + | 13.42186904 | 9.050942949 |
| GSM773759 | EGFR mutation + | 13.05294617 | 10.12467075 |
| GSM773760 | EGFR mutation + | 13.34862526 | 9.16670189  |
| GSM773761 | EGFR mutation + | 13.0943174  | 9.569038546 |
| GSM773762 | EGFR mutation + | 13.53045828 | 9.474932026 |
| GSM773763 | EGFR mutation + | 13.54685661 | 9.567219904 |
| GSM773764 | EGFR mutation + | 12.87296839 | 10.77107121 |
| GSM773765 | EGFR mutation + | 12.88250321 | 9.625698616 |

---

## GO\_KEGG

| ONTOLOGY | ID         | Description                                         | GeneRatio | BgRatio   | p-value     | p.adjust    | q-value     | GeneID                                                                                                                                                                                                                                                                                                                                                                      | Count |
|----------|------------|-----------------------------------------------------|-----------|-----------|-------------|-------------|-------------|-----------------------------------------------------------------------------------------------------------------------------------------------------------------------------------------------------------------------------------------------------------------------------------------------------------------------------------------------------------------------------|-------|
| BP       | GO:0016570 | histone modification                                | 62/840    | 494/18800 | 1.70177E-13 | 8.06811E-10 | 6.92891E-10 | KMT2A/ASXL1/TRIP12/EP300/RNF20/NCOA3/HUWE1/RIF1/REST/KDM5B/TAF1/MCM3AP/KDM2A/TET3/EYA3/RNF168/KMT2E/ELK4/BRPF3/JARID2/RNF40/EHMT1/CHD3/CREBBP/KMT2D/SETD1B/CHD4/BAZ2A/BCOR/MIDEAS/NIPBL/ASH1L/NSD1/HDAC4/YEATS2/SUPT6H/HCF1/KAT6B/KMT2C/ATRX/GTF3C4/USP36/TRRAP/TAF4/BAZ1B/ATM/PHF8/MLLT6/EP400/PER2/UBR5/SKI/SETD5/MLLT3/MTHFR/MYSM1/PRKAA2/FBXL19/KDM6B/AASS/DNMT3B/PADI2 | 62    |
| BP       | GO:0016055 | Wnt signaling pathway                               | 43/840    | 452/18800 | 2.67851E-06 | 0.000552122 | 0.000474163 | BCL9L/CTNND1/CHD8/TNKS/USP34/LRP6/FOXO3/FZD5/CELSR1/NOTCH1/DAB2IP/KANK1/ABL1/LRP5/MED12/MACF1/BCL9/SMURF1/JRK/UBR5/SKI/PTK7/FAM53B/MLLT3/PRKAA2/WNK1/AMOTL2/PKD1/ROR1/AXIN2/LRP1/RNF43/NKD1/FZD4/PRICKLE1/SOX13/AMOTL1/PTPRU/RNF213/GLI3/LRP4/DCDC2/CCND1                                                                                                                   | 43    |
| BP       | GO:0035329 | hippo signaling                                     | 10/840    | 40/18800  | 7.51044E-06 | 0.000962351 | 0.000826469 | MOB1B/TEAD3/SHANK2/NF2/AJUBA/DLG5/AMOTL2/AMOT/AMOTL1/DCHS1                                                                                                                                                                                                                                                                                                                  | 10    |
| BP       | GO:0000209 | protein polyubiquitination                          | 25/840    | 244/18800 | 0.000101018 | 0.006301676 | 0.005411891 | UBE4A/TRIP12/TNKS/TTC3/RNF20/HECTD1/CBL/HUWE1/TAF1/AREL1/RNF168/RMND5A/ANAPC1/RNF26/RNF40/SASH1/RC3H2/MARCHF6/PP12/UBE4B/PPP2S/MURF1/TRIM56/UBR5/RNF213                                                                                                                                                                                                                     | 25    |
| BP       | GO:0060071 | Wnt signaling pathway, planar cell polarity pathway | 9/840     | 53/18800  | 0.000513689 | 0.018039997 | 0.01549278  | CELSR1/ABL1/MED12/SMURF1/PTK7/MLLT3/ROR1/NKD1/PRICKLE1                                                                                                                                                                                                                                                                                                                      | 9     |
| CC       | GO:0005911 | cell-cell junction                                  | 49/863    | 497/19594 | 1.23028E-07 | 7.02488E-05 | 5.72402E-05 | CTNND1/UBN1/SPECC1L/PKP4/TLN1/TJP1/PPL/FZD5/RAPGEF2/PIKFYVE/WASF2/NF2/NOTCH1/ASH1L/PARD3B/CDC42BPB/PATJ/AJUBA/MPDZ/TJP2/TNKS1BP1/MYH9/PTK7/CDC42BPA/PODXL/AHNAK/PNN/AMOTL2/SHROOM3/MAGI3/AMOT/SPTBN2/DSP/PDZD2/FLNA/FZD4/SHROOM4/ARVCF/AMOTL1/PTPRU/NECTIN1/CGNL1/KIRREL1/DSC2/DCHS1/TRPC6/CGN/HMCN1/CCND1                                                                  | 49    |
| CC       | GO:0035770 | ribonucleoprotein granule                           | 28/863    | 261/19594 | 1.33322E-05 | 0.000761267 | 0.000620297 | DDX6/GIGYF2/AGO1/KHNYN/PUM1/ROCK2/UBAP2/TNRC6B/UPF2/AGO3/EIF4G1/NCL/TUT4/CNOT1/PMS2/RC3H2/TRIM25/ZNF1/AJUBA/PRRC2C/NSUN2/LARP1/UPF1/AGO2/TNRC6A/PRKAA2/SMN2/NYNRIN                                                                                                                                                                                                          | 28    |
| CC       | GO:0005923 | bicellular tight junction                           | 16/863    | 124/19594 | 0.000110384 | 0.003707607 | 0.003021038 | UBN1/TJP1/FZD5/RAPGEF2/ASH1L/PARD3B/PATJ/MPDZ/TJP2/AMOTL2/MAGI3/AMOT/AMOTL1/CGNL1/CGN/CCND1                                                                                                                                                                                                                                                                                 | 16    |
| MF       | GO:0042393 | histone binding                                     | 41/843    | 250/18410 | 1.00264E-12 | 6.23633E-10 | 5.24664E-10 | KMT2A/INO80/CHD8/TNKS/RNF20/KDM5B/TAF1/MCM3AP/CHD6/TP53BP1/RNF168/KMT2E/JARID2/SBNO1/PHC3/CHD3/BPTF/KMT2D/CHD4/CHD2/BAZ2A/ZZF1/HIRA/YEATS2/SUPT6H/KAT6B/KMT2C/BRD2/ATRX/BRD3/BAZ1B/PHF8/MLLT6/NCAPD3/MLLT3/MYSM1/NCAPD2/NASP/CHD7/AASS/TSPYL5                                                                                                                               | 41    |
| MF       | GO:0140297 | DNA-binding transcription factor binding            | 50/843    | 470/18410 | 2.6755E-08  | 4.21124E-06 | 3.54292E-06 | THRAP3/ASXL1/HIF1AN/RBFOX2/TRIP12/EP300/TOB2/NCOA3/REST/TEAD3/TAF1/NCL/SPEN/NCOR1/TP53BP1/UBXN7/HIPK2/CNOT1/MED1/CREBBP/PDCD11/GT F21/RXRA/CHD4/NOTCH2/BAZ2A/BCOR/NSD1/HDAC4/HIRA/HCF1/KAT6B/NCOA6/MED12/PPARA/TAF4/DNMT3A/SKI/ARID1A/PBX2/SMARCA1/DHX33/PRKDC/NCOR2/FLNA/NFIA/FOXC1/TRIB2/CENPF/PADI2                                                                      | 50    |
| MF       | GO:0042813 | Wnt-activated receptor activity                     | 6/843     | 15/18410  | 3.17508E-05 | 0.001388216 | 0.00116791  | LRP6/FZD5/LRP5/PKD1/ROR1/FZD4                                                                                                                                                                                                                                                                                                                                               | 6     |
| KEGG     | hsa04512   | ECM-receptor interaction                            | 16/357    | 88/8164   | 1.03892E-06 | 0.000267002 | 0.000225281 | LAMC1/LAMA5/HSPG2/AGRN/FRAS1/VWF/COL4A2/ITGA9/LAMB1/ITGA6/COL4A1/FREM2/COL4A5/ITGA8/TNXB/LAMA3                                                                                                                                                                                                                                                                              | 16    |
| KEGG     | hsa04330   | Notch signaling pathway                             | 10/357    | 59/8164   | 0.000208281 | 0.007437013 | 0.006274932 | ATXN1L/EP300/NOTCH1/CREBBP/NOTCH2/MAML3/NOTCH3/NCOR2/MAML2/DTX4                                                                                                                                                                                                                                                                                                             | 10    |
| KEGG     | hsa04151   | PI3K-Akt signaling pathway                          | 28/357    | 354/8164  | 0.001648311 | 0.032585841 | 0.027494094 | PPP2R1B/SOS1/FOXO3/LAMC1/IGF1R/MTOR/RXRA/LAMA5/INSR/TSC1/PRKAA2/PHLPP1/WF/COL4A2/PIK3R3/FLT1/ITGA9/LAMB1/ITGA6/COL4A1/CDK6/COL4A5/IRS1/ITGA8/TNXB/LAMA3/CCND1/LPAR3                                                                                                                                                                                                         | 28    |
| KEGG     | hsa04152   | AMPK signaling pathway                              | 12/357    | 121/8164  | 0.00649778  | 0.07260563  | 0.061260535 | PPP2R1B/FOXO3/IGF1R/MTOR/ACACA/INSR/TSC1/FASN/PRKAA2/PIK3R3/IRS1/CND1                                                                                                                                                                                                                                                                                                       | 12    |
| KEGG     | hsa04310   | Wnt signaling pathway                               | 15/357    | 170/8164  | 0.007409394 | 0.079342258 | 0.066944522 | CHD8/ROCK2/EP300/LRP6/FZD5/CREBBP/LRP5/PLCB3/ROR1/AXIN2/RNF43/NKD1/FZD4/PRICKLE1/CCND1                                                                                                                                                                                                                                                                                      | 15    |

**REN\_immunotherapy\_DATA**

| <b>Sample ID</b> | <b>OS (months)</b> | <b>OS Status</b> | <b>PFS (months)</b> | <b>PFS Status</b> | <b>YAP1</b> |
|------------------|--------------------|------------------|---------------------|-------------------|-------------|
| M19D8102V1R1     | 28.1               | 0                | 7.2                 | 0                 | 16.34       |
| M19D7753V1R1     | 24                 | 0                | 23.7                | 1                 | 57.48       |
| M19D7754V1R1     | 13.8               | 1                | 4.4                 | 1                 | 62.63       |
| M19D8105V1R1     | 24.4               | 0                | 21.8                | 1                 | 39.64       |
| M19D8111V1R1     | 22.2               | 0                | 4                   | 1                 | 59.6        |
| M19D8112V1R1     | 7                  | 0                | 1                   | 1                 | 29.47       |
| M19D7731V1R1     | 15.6               | 1                | 5.8                 | 1                 | 89.65       |
| M19D7740V1R1     | 5.3                | 1                | 1.6                 | 1                 | 96.12       |
| M19D8110V1R1     | 21.4               | 0                | 13.1                | 1                 | 86.48       |
| M19D7729V1R1     | 17.7               | 0                | 8.6                 | 1                 | 139.94      |
| M19D7737V1R1     | 18                 | 1                | 5.1                 | 1                 | 68.63       |
| M19D7744V1R1     | 17.3               | 1                | 1.4                 | 1                 | 132.4       |
| M19D7748V1R1     | 2.7                | 0                | 2.7                 | 1                 | 110.64      |
| M19D8114V1R1     | 15.2               | 0                | 0.1                 | 0                 | 46.07       |
| M19D7735V1R1     | 18.9               | 0                | 5.6                 | 1                 | 134.36      |
| M19D7752V1R1     | 22.2               | 0                | 7                   | 1                 | 112.15      |
| M19D7734V1R1     | 6.4                | 1                | 2.8                 | 1                 | 121.97      |
| M19D7746V1R1     | 24.6               | 0                | 8.3                 | 1                 | 70.9        |

**GSE135222**

| <b>Gene_id</b> | <b>PFS (months)</b> | <b>PFS STATUS</b> | <b>RESPONSE</b> | <b>YAP1</b> |
|----------------|---------------------|-------------------|-----------------|-------------|
| NSCLC1327      | 6.8                 | 0                 | DCB             | 45.07       |
| NSCLC1352      | 8.3                 | 0                 | DCB             | 61.69       |
| NSCLC1358      | 8.6                 | 1                 | DCB             | 12.46       |
| NSCLC1510      | 10.8                | 0                 | DCB             | 57.16       |
| NSCLC1528      | 9.3                 | 0                 | DCB             | 17.56       |
| NSCLC1708      | 5.6                 | 1                 | DCB             | 17.93       |
| NSCLC378       | 13.7                | 0                 | DCB             | 97.94       |
| NSCLC947       | 20.6                | 0                 | DCB             | 4.68        |
| NSCLC1017      | 1.3                 | 1                 | NDB             | 14.52       |
| NSCLC1066      | 0.8                 | 1                 | NDB             | 113.88      |
| NSCLC1079      | 5.8                 | 1                 | NDB             | 8.62        |
| NSCLC1104      | 1.1                 | 1                 | NDB             | 52.71       |
| NSCLC1145      | 2.4                 | 1                 | NDB             | 11.5        |
| NSCLC1155      | 1.1                 | 1                 | NDB             | 83.71       |
| NSCLC1164      | 0.4                 | 1                 | NDB             | 37.42       |
| NSCLC1203      | 0.8                 | 1                 | NDB             | 38.07       |
| NSCLC1401      | 0.9                 | 1                 | NDB             | 31.22       |
| NSCLC1412      | 0.1                 | 1                 | NDB             | 64.34       |
| NSCLC1425      | 2                   | 1                 | NDB             | 59.71       |
| NSCLC1508      | 2.2                 | 1                 | NDB             | 44.81       |
| NSCLC1554      | 1.2                 | 1                 | NDB             | 19          |
| NSCLC1619      | 2.7                 | 1                 | NDB             | 76.63       |
| NSCLC1809      | 1.5                 | 1                 | NDB             | 38.46       |
| NSCLC1873      | 1.2                 | 1                 | NDB             | 22.44       |
| NSCLC573       | 1.5                 | 1                 | NDB             | 54.63       |
| NSCLC825       | 1.4                 | 1                 | NDB             | 44.92       |
| NSCLC990       | 3.2                 | 1                 | NDB             | 6.95        |
